# Supplementary material
Source: PubMed Central journal article supplement (PMC6440217)
Supplement: NIHMS1001304-supplement-5.pdf [file NIHMS1001304-supplement-5.pdf]

# Supporting Information for “Simple Entropy Terms for End-Point Binding Free Energy Calculations”

William M. Menzer,<sup>†</sup> Chen Li,<sup>‡</sup> Wenji Sun,<sup>†</sup> Bing Xie,<sup>‡</sup> and David D. L. Minh<sup>\*,‡</sup>

*Department of Biological Sciences, Illinois Institute of Technology, Chicago, IL 60616,  
USA, and Department of Chemistry, Illinois Institute of Technology, Chicago, IL 60616,  
USA*

E-mail: dminh@iit.edu

---

\*To whom correspondence should be addressed

<sup>†</sup>Illinois Tech Biological Sciences

<sup>‡</sup>Illinois Tech Chemistry

Table S1: **Details of each of the 6 datasets**

| Dataset Name        | # Ligands | Structural Data Source                                                                                                                                                                                                                                                                                                                                               | Binding Data Source                                                                           |
|---------------------|-----------|----------------------------------------------------------------------------------------------------------------------------------------------------------------------------------------------------------------------------------------------------------------------------------------------------------------------------------------------------------------------|-----------------------------------------------------------------------------------------------|
| bromodomains        | 8         | PDB identifiers 3MXF, 3SVG, 3U5J, 3U5L, 4J0R, 4MR3, 4MR4, and 4OGJ                                                                                                                                                                                                                                                                                                   | Isothermal titration calorimetry reported by Aldeghi et al. <sup>1</sup>                      |
| FXR                 | 31        | Roche crystal structures donated to D3R ( <a href="http://dx.doi.org/10.15782/D6RP4P">http://dx.doi.org/10.15782/D6RP4P</a> ) Identifiers: 1btoj, 1dqzc, 1fggu, 1fymf, 1hoia, 1hqmf, 1hvih, 1ifba, 1ivlk, 1ixdk, 1jski, 1kjyp, 1kmrz, 1lkvm, 1lrpw, 1nqqw, 1pdbc, 1rfr, 1rtaz, 1rwui, 1rzch, 1skpl, 1uxjy, 1wgph, 1wles, 1xivt, 1xxar, 1yfn, 1ymrc, 1ytut, and 1zxbd | IC <sub>50</sub> measured with a competitive binding assay, the scintillation proximity assay |
| hPNMT               | 7         | PDB identifiers 1HNN, 1N7J, 2G70, 2G71, 2G72, 2G8N, and 2ONY                                                                                                                                                                                                                                                                                                         | $k_i$ reported by Gee et al. <sup>2</sup>                                                     |
| lysozyme            | 9         | PDB identifiers 181L, 182L, 183L, 184L, 185L, 186L, 187L, 188L, and 1NHB                                                                                                                                                                                                                                                                                             | Isothermal titration calorimetry reported by Morton and Matthews <sup>3</sup>                 |
| MAP4K4              | 18        | Subset of Genentech crystal structures donated to D3R ( <a href="http://dx.doi.org/10.15782/D6WC7Z">http://dx.doi.org/10.15782/D6WC7Z</a> ) Identifiers: MAP01, MAP02, MAP03, MAP04, MAP05, MAP06, MAP07, MAP08, MAP09, MAP11, MAP12, MAP13, MAP14, MAP15, MAP16, MAP17, MAP18, and MAP19                                                                            | $k_i$ measured with Z-LYTE biochemical assay                                                  |
| Interaction Entropy | 14        | PDB identifiers 2BRB, 2IWX, 2VW5, 2WBG, 2X00, 2XDL, 2YGE, 2ZJW, 3AO4, 3K5V, 3KGP, 3OWJ, 4DES, and 4DEW.                                                                                                                                                                                                                                                              | Compiled by Duan et al. <sup>4</sup>                                                          |

Table S2: Comparison between PROPKA and AmberTools default protonation states, showing distances to the closest ligand atom in the crystal structure. No differences were observed in the bromodomain dataset.

| Dataset | ID    | Residue | PROPKA | AmberTools | Distance (Å) |
|---------|-------|---------|--------|------------|--------------|
| FXR     | 1nqqw | 205     | HID    | HIE        | 2.300        |
|         |       | 52      | HID    | HIE        | 3.739        |
|         |       | 204     | HID    | HIE        | 4.290        |
|         |       | 203     | HID    | HIE        | 7.158        |
|         |       | 102     | HID    | HIE        | 9.483        |
|         |       | 71      | HIP    | HIE        | 17.371       |
|         |       | 12      | HID    | HIE        | 24.410       |
|         |       | 180     | HID    | HIE        | 27.777       |
|         | 1fggu | 52      | HID    | HIE        | 2.315        |
|         |       | 204     | HID    | HIE        | 7.859        |
|         |       | 203     | HIP    | HIE        | 10.443       |
|         |       | 12      | HID    | HIE        | 17.336       |
|         |       | 180     | HID    | HIE        | 20.035       |
|         |       | 71      | HID    | HIE        | 22.760       |
|         | 1btoj | 52      | HID    | HIE        | 2.620        |
|         |       | 102     | HID    | HIE        | 7.423        |
|         |       | 204     | HID    | HIE        | 9.034        |
|         |       | 203     | HID    | HIE        | 9.973        |
|         |       | 71      | HID    | HIE        | 21.140       |
|         |       | 12      | HID    | HIE        | 22.236       |
|         |       | 180     | HID    | HIE        | 24.164       |
|         | 1ytut | 205     | HID    | HIE        | 2.886        |
|         |       | 52      | HID    | HIE        | 3.676        |
|         |       | 204     | HID    | HIE        | 7.229        |
|         |       | 102     | HID    | HIE        | 9.779        |
|         |       | 203     | HID    | HIE        | 10.503       |
|         |       | 231     | HID    | HIE        | 18.377       |
|         |       | 12      | HID    | HIE        | 20.159       |
|         |       | 180     | HID    | HIE        | 22.836       |
|         |       | 71      | HID    | HIE        | 23.213       |
|         | 1ivlk | 205     | HID    | HIE        | 3.045        |
|         |       | 52      | HID    | HIE        | 4.034        |
|         |       | 210     | HID    | HIE        | 6.723        |
|         |       | 204     | HID    | HIE        | 8.206        |
|         |       | 102     | HID    | HIE        | 8.630        |
| 203     |       | HIP     | HIE    | 10.394     |              |
| 224     |       | HID     | HIE    | 16.506     |              |
| 12      |       | HID     | HIE    | 21.100     |              |
| 71      |       | HIP     | HIE    | 22.707     |              |
| 180     |       | HID     | HIE    | 24.537     |              |

|       |     |     |     |        |
|-------|-----|-----|-----|--------|
| 1hvih | 205 | HID | HIE | 3.098  |
|       | 52  | HID | HIE | 3.548  |
|       | 102 | HID | HIE | 5.856  |
|       | 213 | HID | HIE | 6.969  |
|       | 204 | HID | HIE | 8.249  |
|       | 203 | HIP | HIE | 10.433 |
|       | 226 | HID | HIE | 17.274 |
|       | 12  | HID | HIE | 21.343 |
|       | 71  | HIP | HIE | 22.822 |
|       | 180 | HID | HIE | 25.494 |
| lixdk | 52  | HID | HIE | 3.212  |
|       | 204 | HIP | HIE | 7.606  |
|       | 102 | HID | HIE | 9.095  |
|       | 203 | HID | HIE | 11.280 |
|       | 12  | HID | HIE | 16.604 |
|       | 232 | HID | HIE | 18.924 |
|       | 180 | HID | HIE | 19.983 |
|       | 71  | HID | HIE | 22.592 |
| lymrc | 200 | HID | HIE | 3.244  |
|       | 47  | HID | HIE | 3.564  |
|       | 97  | HID | HIE | 6.331  |
|       | 199 | HID | HIE | 7.374  |
|       | 212 | HID | HIE | 9.970  |
|       | 198 | HID | HIE | 10.198 |
|       | 12  | HID | HIE | 21.406 |
|       | 175 | HID | HIE | 23.016 |
|       | 66  | HID | HIE | 23.338 |
| 1hoia | 52  | HID | HIE | 3.296  |
|       | 205 | HID | HIE | 5.349  |
|       | 204 | HIP | HIE | 7.192  |
|       | 102 | HID | HIE | 8.983  |
|       | 217 | HID | HIE | 10.556 |
|       | 203 | HID | HIE | 10.756 |
|       | 12  | HID | HIE | 17.907 |
|       | 232 | HID | HIE | 18.429 |
|       | 180 | HID | HIE | 20.598 |
|       | 71  | HID | HIE | 23.403 |
| 1fymf | 52  | HID | HIE | 3.330  |
|       | 204 | HID | HIE | 7.326  |
|       | 102 | HID | HIE | 9.123  |
|       | 217 | HID | HIE | 10.334 |
|       | 203 | HID | HIE | 11.106 |
|       | 12  | HID | HIE | 17.812 |
|       | 231 | HID | HIE | 18.946 |

|       |       |     |     |        |        |
|-------|-------|-----|-----|--------|--------|
| FXR   |       | 180 | HID | HIE    | 20.231 |
|       |       | 71  | HID | HIE    | 22.949 |
|       | 1kjyp | 205 | HID | HIE    | 3.331  |
|       |       | 52  | HID | HIE    | 3.730  |
|       |       | 204 | HID | HIE    | 7.070  |
|       |       | 102 | HID | HIE    | 7.668  |
|       |       | 203 | HID | HIE    | 9.809  |
|       |       | 230 | HID | HIE    | 16.257 |
|       |       | 12  | HID | HIE    | 18.001 |
|       |       | 71  | HIP | HIE    | 22.447 |
|       |       | 180 | HID | HIE    | 24.897 |
|       | 1yfjn | 52  | HID | HIE    | 3.394  |
|       |       | 204 | HIP | HIE    | 7.231  |
|       |       | 102 | HID | HIE    | 9.301  |
|       |       | 203 | HID | HIE    | 11.114 |
|       |       | 12  | HID | HIE    | 17.502 |
|       |       | 231 | HID | HIE    | 18.377 |
|       |       | 180 | HID | HIE    | 21.367 |
|       |       | 71  | HID | HIE    | 23.106 |
|       | 1rfrf | 54  | HID | HIE    | 3.426  |
|       |       | 207 | HID | HIE    | 3.808  |
|       |       | 104 | HID | HIE    | 4.336  |
|       |       | 206 | HID | HIE    | 6.999  |
|       |       | 205 | HID | HIE    | 9.765  |
|       |       | 219 | HID | HIE    | 10.219 |
|       |       | 14  | HID | HIE    | 20.403 |
|       |       | 73  | HID | HIE    | 22.919 |
|       |       | 182 | HID | HIE    | 23.981 |
|       | 2     | HID | HIE | 34.745 |        |
| 1hqmf | 52    | HID | HIE | 3.429  |        |
|       | 205   | HID | HIE | 3.590  |        |
|       | 102   | HID | HIE | 7.848  |        |
|       | 204   | HID | HIE | 7.908  |        |
|       | 203   | HID | HIE | 10.585 |        |
|       | 12    | HID | HIE | 15.918 |        |
|       | 180   | HID | HIE | 20.444 |        |
|       | 71    | HID | HIE | 22.353 |        |
| 1wgph | 52    | HID | HIE | 3.461  |        |
|       | 205   | HID | HIE | 3.941  |        |
|       | 204   | HID | HIE | 6.269  |        |
|       | 102   | HID | HIE | 8.851  |        |
|       | 203   | HID | HIE | 9.539  |        |
|       | 217   | HID | HIE | 9.641  |        |
|       | 232   | HID | HIE | 15.981 |        |
|       | 12    | HID | HIE | 17.881 |        |

|       |       |     |     |        |        |
|-------|-------|-----|-----|--------|--------|
| FXR   |       | 71  | HID | HIE    | 23.038 |
|       |       | 180 | HID | HIE    | 23.986 |
|       | 1xxar | 205 | HID | HIE    | 3.461  |
|       |       | 52  | HID | HIE    | 3.932  |
|       |       | 102 | HID | HIE    | 7.271  |
|       |       | 204 | HID | HIE    | 8.604  |
|       |       | 203 | HID | HIE    | 11.186 |
|       |       | 226 | HID | HIE    | 17.369 |
|       |       | 12  | HID | HIE    | 18.395 |
|       |       | 180 | HID | HIE    | 24.996 |
|       | 1rtaz | 52  | HID | HIE    | 3.499  |
|       |       | 204 | HIP | HIE    | 7.151  |
|       |       | 102 | HID | HIE    | 8.993  |
|       |       | 217 | HID | HIE    | 10.465 |
|       |       | 203 | HID | HIE    | 11.001 |
|       |       | 232 | HID | HIE    | 18.082 |
|       |       | 12  | HID | HIE    | 18.226 |
|       |       | 180 | HID | HIE    | 22.379 |
|       |       | 71  | HID | HIE    | 23.191 |
|       | 1sjpr | 206 | HID | HIE    | 3.570  |
|       |       | 53  | HID | HIE    | 3.994  |
|       |       | 103 | HID | HIE    | 7.377  |
|       |       | 205 | HID | HIE    | 8.606  |
|       |       | 213 | HID | HIE    | 9.809  |
|       |       | 204 | HIP | HIE    | 11.115 |
|       |       | 13  | HID | HIE    | 18.270 |
|       |       | 72  | HID | HIE    | 22.662 |
|       |       | 181 | HID | HIE    | 24.980 |
| 1dqzc | 52    | HID | HIE | 3.582  |        |
|       | 205   | HID | HIE | 4.337  |        |
|       | 204   | HIP | HIE | 6.426  |        |
|       | 203   | HID | HIE | 9.766  |        |
|       | 102   | HID | HIE | 9.808  |        |
|       | 232   | HID | HIE | 16.543 |        |
|       | 12    | HID | HIE | 19.926 |        |
|       | 180   | HID | HIE | 20.799 |        |
|       | 71    | HID | HIE | 23.265 |        |
| 1rwui | 52    | HID | HIE | 3.623  |        |
|       | 205   | HID | HIE | 5.970  |        |
|       | 102   | HID | HIE | 9.030  |        |
|       | 204   | HIP | HIE | 10.414 |        |
|       | 217   | HID | HIE | 10.691 |        |
|       | 203   | HID | HIE | 12.912 |        |
|       | 232   | HID | HIE | 18.875 |        |
|       | 180   | HID | HIE | 19.707 |        |

|       |       |     |     |        |        |
|-------|-------|-----|-----|--------|--------|
| FXR   |       | 12  | HID | HIE    | 20.525 |
|       |       | 71  | HID | HIE    | 23.156 |
|       | 1zhbd | 52  | HID | HIE    | 3.623  |
|       |       | 204 | HID | HIE    | 4.368  |
|       |       | 101 | HID | HIE    | 7.566  |
|       |       | 203 | HID | HIE    | 9.308  |
|       |       | 202 | HIP | HIE    | 11.759 |
|       |       | 229 | HID | HIE    | 16.833 |
|       |       | 12  | HID | HIE    | 21.667 |
|       |       | 71  | HIP | HIE    | 23.103 |
|       |       | 179 | HID | HIE    | 25.614 |
|       | 1skpl | 52  | HID | HIE    | 3.632  |
|       |       | 205 | HID | HIE    | 6.288  |
|       |       | 102 | HID | HIE    | 8.966  |
|       |       | 204 | HIP | HIE    | 10.220 |
|       |       | 217 | HID | HIE    | 10.778 |
|       |       | 203 | HID | HIE    | 13.114 |
|       |       | 232 | HID | HIE    | 19.113 |
|       |       | 12  | HID | HIE    | 19.132 |
|       |       | 180 | HID | HIE    | 21.688 |
|       |       | 71  | HID | HIE    | 23.208 |
|       | 1rzch | 52  | HID | HIE    | 3.661  |
|       |       | 205 | HID | HIE    | 3.754  |
|       |       | 204 | HIP | HIE    | 6.068  |
|       |       | 102 | HID | HIE    | 9.550  |
|       |       | 203 | HID | HIE    | 9.767  |
|       |       | 232 | HID | HIE    | 17.646 |
|       |       | 180 | HID | HIE    | 20.238 |
|       | 12    | HID | HIE | 20.506 |        |
|       | 71    | HID | HIE | 23.244 |        |
| 1jski | 52    | HID | HIE | 3.682  |        |
|       | 205   | HID | HIE | 4.349  |        |
|       | 204   | HID | HIE | 7.697  |        |
|       | 102   | HID | HIE | 9.095  |        |
|       | 203   | HID | HIE | 11.281 |        |
|       | 12    | HID | HIE | 20.297 |        |
|       | 180   | HID | HIE | 22.262 |        |
|       | 71    | HID | HIE | 23.324 |        |
| 1xivt | 52    | HID | HIE | 3.683  |        |
|       | 205   | HID | HIE | 3.971  |        |
|       | 204   | HIP | HIE | 7.838  |        |
|       | 102   | HID | HIE | 8.924  |        |
|       | 203   | HID | HIE | 11.249 |        |
|       | 233   | HID | HIE | 18.791 |        |
|       | 180   | HID | HIE | 19.766 |        |

|     |       |     |     |        |        |
|-----|-------|-----|-----|--------|--------|
| FXR |       | 12  | HID | HIE    | 20.470 |
|     |       | 71  | HID | HIE    | 23.189 |
|     | 1lkvm | 52  | HID | HIE    | 3.696  |
|     |       | 205 | HID | HIE    | 4.318  |
|     |       | 204 | HID | HIE    | 6.344  |
|     |       | 102 | HID | HIE    | 8.978  |
|     |       | 203 | HID | HIE    | 9.948  |
|     |       | 232 | HID | HIE    | 17.612 |
|     |       | 12  | HID | HIE    | 20.227 |
|     |       | 180 | HID | HIE    | 21.263 |
|     |       | 71  | HID | HIE    | 23.258 |
|     | 1txca | 52  | HID | HIE    | 3.697  |
|     |       | 205 | HID | HIE    | 5.413  |
|     |       | 204 | HIP | HIE    | 7.425  |
|     |       | 217 | HID | HIE    | 9.907  |
|     |       | 102 | HID | HIE    | 9.956  |
|     |       | 203 | HID | HIE    | 11.037 |
|     |       | 232 | HID | HIE    | 18.715 |
|     |       | 12  | HID | HIE    | 20.626 |
|     |       | 180 | HID | HIE    | 20.728 |
|     | 71    | HID | HIE | 23.396 |        |
|     | 1ifba | 205 | HID | HIE    | 3.721  |
|     |       | 52  | HID | HIE    | 3.752  |
|     |       | 204 | HIP | HIE    | 7.393  |
|     |       | 102 | HID | HIE    | 9.099  |
|     |       | 217 | HID | HIE    | 10.300 |
|     |       | 203 | HID | HIE    | 10.899 |
|     |       | 232 | HID | HIE    | 18.397 |
|     |       | 12  | HID | HIE    | 20.090 |
|     |       | 180 | HID | HIE    | 21.280 |
|     | 71    | HID | HIE | 23.391 |        |
|     | 1wles | 51  | HID | HIE    | 3.809  |
|     |       | 204 | HID | HIE    | 5.259  |
|     |       | 203 | HIP | HIE    | 7.283  |
|     |       | 101 | HID | HIE    | 9.296  |
|     |       | 202 | HID | HIE    | 10.830 |
|     |       | 11  | HID | HIE    | 19.033 |
|     |       | 179 | HID | HIE    | 20.069 |
|     |       | 70  | HID | HIE    | 23.511 |
|     | 1uxjy | 52  | HID | HIE    | 3.831  |
| 204 |       | HIP | HIE | 7.449  |        |
| 102 |       | HID | HIE | 9.872  |        |
| 203 |       | HID | HIE | 10.845 |        |
| 233 |       | HID | HIE | 18.467 |        |
| 12  |       | HID | HIE | 20.719 |        |



|       |       |     |     |        |        |        |
|-------|-------|-----|-----|--------|--------|--------|
| FXR   |       | 180 | HID | HIE    | 21.063 |        |
|       |       | 71  | HID | HIE    | 23.371 |        |
|       | 1pdbc |     | 52  | HID    | HIE    | 3.888  |
|       |       |     | 204 | HID    | HIE    | 3.973  |
|       |       |     | 203 | HID    | HIE    | 7.508  |
|       |       |     | 102 | HID    | HIE    | 8.360  |
|       |       |     | 211 | HID    | HIE    | 9.704  |
|       |       |     | 202 | HID    | HIE    | 9.829  |
|       |       |     | 223 | HID    | HIE    | 16.684 |
|       |       |     | 71  | HID    | HIE    | 21.427 |
|       |       |     | 12  | HID    | HIE    | 24.621 |
|       |       |     | 180 | HID    | HIE    | 25.355 |
|       | 1kmrz |     | 200 | HID    | HIE    | 3.911  |
|       |       |     | 52  | HID    | HIE    | 4.466  |
|       |       |     | 210 | HID    | HIE    | 8.099  |
|       |       |     | 199 | HID    | HIE    | 8.190  |
|       |       |     | 198 | HIP    | HIE    | 10.580 |
|       |       |     | 225 | HID    | HIE    | 15.939 |
|       |       |     | 12  | HID    | HIE    | 17.398 |
|       |       | 71  | HIP | HIE    | 22.738 |        |
|       |       | 175 | HID | HIE    | 22.812 |        |
| hPNMT | 2g8n  | 197 | GLH | GLU    | 2.361  |        |
|       |       | 163 | GLH | GLU    | 5.150  |        |
|       |       | 107 | HID | HIE    | 7.623  |        |
|       |       | 239 | HID | HIE    | 9.185  |        |
|       |       | 71  | HID | HIE    | 16.386 |        |
|       |       | 178 | HID | HIE    | 18.417 |        |
|       | 2ony  | 196 | GLH | GLU    | 2.644  |        |
|       |       | 162 | GLH | GLU    | 5.672  |        |
|       |       | 106 | HID | HIE    | 7.686  |        |
|       |       | 238 | HID | HIE    | 9.467  |        |
|       |       | 54  | ASH | ASP    | 11.933 |        |
|       |       | 137 | HID | HIE    | 14.696 |        |
|       |       | 177 | HID | HIE    | 19.711 |        |
|       | 2g71  | 199 | GLH | GLU    | 2.734  |        |
|       |       | 37  | LYN | LYS    | 2.781  |        |
|       |       | 165 | GLH | GLU    | 5.064  |        |
|       |       | 109 | HID | HIE    | 8.683  |        |
|       |       | 241 | HID | HIE    | 9.553  |        |
|       |       | 140 | HID | HIE    | 12.195 |        |
| 57    |       | ASH | ASP | 12.202 |        |        |
| 180   |       | HID | HIE | 17.556 |        |        |
| 73    |       | HID | HIE | 19.013 |        |        |
|       | 203   | GLH | GLU | 2.761  |        |        |
|       | 169   | GLH | GLU | 5.216  |        |        |

|        |       |          |      |     |        |        |
|--------|-------|----------|------|-----|--------|--------|
| hPNMT  |       | 245      | HID  | HIE | 9.465  |        |
|        |       | 113      | HID  | HIE | 9.510  |        |
|        |       | 144      | HID  | HIE | 12.853 |        |
|        |       | 77       | HID  | HIE | 18.284 |        |
|        |       | 184      | HID  | HIE | 18.494 |        |
|        |       | 198      | GLH  | GLU | 2.819  |        |
|        | 1hmn  |          | 164  | GLH | GLU    | 5.750  |
|        |       |          | 240  | HID | HIE    | 9.208  |
|        |       |          | 56   | ASH | ASP    | 12.039 |
|        |       |          | 108  | HID | HIE    | 12.239 |
|        |       |          | 139  | HID | HIE    | 14.906 |
|        |       |          | 179  | HID | HIE    | 20.033 |
|        |       |          | 72   | HID | HIE    | 21.930 |
|        |       |          | 200  | GLH | GLU    | 2.856  |
|        | 2g70  |          | 38   | LYN | LYS    | 3.371  |
|        |       |          | 166  | GLH | GLU    | 4.126  |
|        |       |          | 242  | HID | HIE    | 9.468  |
|        |       |          | 110  | HID | HIE    | 12.111 |
|        |       |          | 58   | ASH | ASP    | 12.538 |
|        |       |          | 181  | HID | HIE    | 18.437 |
|        |       |          | 74   | HID | HIE    | 22.113 |
|        |       |          | 198  | GLH | GLU    | 3.048  |
|        | 1n7j  |          | 36   | LYN | LYS    | 4.138  |
|        |       |          | 164  | GLH | GLU    | 5.764  |
|        |       |          | 240  | HID | HIE    | 10.265 |
|        |       |          | 56   | ASH | ASP    | 12.315 |
|        |       |          | 139  | HID | HIE    | 14.553 |
|        |       |          | 108  | HID | HIE    | 14.576 |
|        |       |          | 179  | HID | HIE    | 19.569 |
|        |       |          | 72   | HID | HIE    | 22.251 |
|        |       | lysozyme | 188l | 31  | HID    | HIE    |
|        | 181l  |          | 31   | HID | HIE    | 18.531 |
|        | 182l  |          | 31   | HID | HIE    | 18.421 |
| 183l   | 31    |          | HID  | HIE | 18.135 |        |
| 184l   | 31    |          | HID  | HIE | 18.675 |        |
| 185l   | 31    |          | HID  | HIE | 18.133 |        |
| 186l   | 31    |          | HID  | HIE | 18.620 |        |
| 187l   | 31    |          | HID  | HIE | 18.692 |        |
| 1nhb   | 31    |          | HID  | HIE | 18.755 |        |
| MAP4K4 | MAP01 | 133      | HIP  | HIE | 8.731  |        |
|        |       | 287      | HID  | HIE | 11.770 |        |
|        |       | 29       | HID  | HIE | 12.664 |        |
|        |       | 63       | HID  | HIE | 13.310 |        |
|        |       | 125      | HID  | HIE | 16.099 |        |

|        |       |     |     |        |        |
|--------|-------|-----|-----|--------|--------|
| MAP4K4 |       | 130 | HID | HIE    | 18.643 |
|        |       | 129 | HID | HIE    | 19.419 |
|        |       | 219 | HID | HIE    | 23.615 |
|        | MAP02 | 64  | HID | HIE    | 10.682 |
|        |       | 286 | HID | HIE    | 12.223 |
|        |       | 30  | HID | HIE    | 13.185 |
|        |       | 127 | HID | HIE    | 13.790 |
|        |       | 131 | HID | HIE    | 17.616 |
|        |       | 132 | HID | HIE    | 18.116 |
|        |       | 218 | HID | HIE    | 22.019 |
|        |       | 81  | HID | HIE    | 22.609 |
|        | MAP03 | 121 | HID | HIE    | 8.500  |
|        |       | 24  | HID | HIE    | 12.231 |
|        |       | 48  | HID | HIE    | 12.987 |
|        |       | 113 | HID | HIE    | 15.473 |
|        |       | 268 | HID | HIE    | 16.622 |
|        |       | 118 | HID | HIE    | 18.840 |
|        |       | 117 | HID | HIE    | 18.980 |
|        |       | 67  | HID | HIE    | 23.436 |
|        |       | 249 | HID | HIE    | 28.032 |
|        | MAP04 | 66  | HID | HIE    | 13.047 |
|        |       | 32  | HID | HIE    | 13.795 |
|        |       | 279 | HID | HIE    | 15.961 |
|        |       | 131 | HID | HIE    | 17.263 |
|        |       | 132 | HID | HIE    | 17.331 |
|        | MAP05 | 278 | HID | HIE    | 12.809 |
|        |       | 127 | HID | HIE    | 14.994 |
|        |       | 131 | HID | HIE    | 16.973 |
|        |       | 132 | HID | HIE    | 17.251 |
|        |       | 81  | HID | HIE    | 22.322 |
|        | 210   | HID | HIE | 22.736 |        |
| MAP06  | 58    | GLH | GLU | 4.527  |        |
|        | 33    | HID | HIE | 12.524 |        |
|        | 67    | HID | HIE | 13.850 |        |
|        | 281   | HID | HIE | 15.620 |        |
|        | 133   | HID | HIE | 18.153 |        |
|        | 134   | HID | HIE | 18.459 |        |
|        | 213   | HID | HIE | 18.785 |        |
|        | 83    | HIP | HIE | 21.880 |        |
| MAP07  | 136   | HID | HIE | 8.001  |        |
|        | 283   | HID | HIE | 12.751 |        |
|        | 63    | HID | HIE | 12.949 |        |
|        | 133   | HID | HIE | 18.113 |        |
|        | 132   | HID | HIE | 18.449 |        |
|        | 215   | HID | HIE | 23.306 |        |

|        |       |     |     |        |        |
|--------|-------|-----|-----|--------|--------|
| MAP4K4 | MAP08 | 134 | HID | HIE    | 8.245  |
|        |       | 27  | HID | HIE    | 12.964 |
|        |       | 276 | HID | HIE    | 12.988 |
|        |       | 61  | HID | HIE    | 13.814 |
|        |       | 126 | HID | HIE    | 16.223 |
|        |       | 131 | HID | HIE    | 18.516 |
|        |       | 130 | HID | HIE    | 19.075 |
|        |       | 80  | HIP | HIE    | 19.256 |
|        | MAP09 | 135 | HIP | HIE    | 7.971  |
|        |       | 28  | HID | HIE    | 12.328 |
|        |       | 289 | HID | HIE    | 12.796 |
|        |       | 127 | HID | HIE    | 13.596 |
|        |       | 131 | HID | HIE    | 17.245 |
|        |       | 132 | HID | HIE    | 18.697 |
| 221    |       | HID | HIE | 23.736 |        |
| MAP11  | 282   | HID | HIE | 10.585 |        |
|        | 52    | GLH | GLU | 11.700 |        |
|        | 65    | HID | HIE | 13.436 |        |
|        | 130   | HID | HIE | 15.249 |        |
|        | 135   | HID | HIE | 18.443 |        |
|        | 134   | HID | HIE | 18.449 |        |
|        | 84    | HID | HIE | 22.100 |        |
| MAP12  | 138   | HID | HIE | 8.449  |        |
|        | 65    | HID | HIE | 10.889 |        |
|        | 31    | HID | HIE | 12.484 |        |
|        | 286   | HID | HIE | 12.993 |        |
|        | 134   | HID | HIE | 17.004 |        |
|        | 135   | HID | HIE | 17.277 |        |
|        | 84    | HID | HIE | 21.194 |        |
| MAP13  | 138   | HID | HIE | 8.549  |        |
|        | 65    | HID | HIE | 11.087 |        |
|        | 31    | HID | HIE | 12.468 |        |
|        | 284   | HID | HIE | 13.182 |        |
|        | 130   | HID | HIE | 14.238 |        |
|        | 134   | HID | HIE | 16.948 |        |
|        | 135   | HID | HIE | 17.238 |        |
|        | 84    | HID | HIE | 21.220 |        |
| MAP14  | 131   | HID | HIE | 8.243  |        |
|        | 62    | HID | HIE | 12.597 |        |
|        | 28    | HID | HIE | 12.654 |        |
|        | 123   | HID | HIE | 15.510 |        |
|        | 285   | HID | HIE | 16.705 |        |
|        | 128   | HID | HIE | 18.259 |        |
|        | 127   | HID | HIE | 18.660 |        |

|        |       |     |     |        |        |
|--------|-------|-----|-----|--------|--------|
| MAP4K4 | MAP15 | 127 | HID | HIE    | 8.596  |
|        |       | 29  | HID | HIE    | 12.271 |
|        |       | 58  | HID | HIE    | 12.997 |
|        |       | 119 | HID | HIE    | 15.207 |
|        |       | 270 | HID | HIE    | 16.807 |
|        |       | 124 | HID | HIE    | 17.178 |
|        |       | 123 | HID | HIE    | 17.318 |
|        |       | 202 | HID | HIE    | 22.755 |
|        | MAP16 | 125 | HID | HIE    | 7.370  |
|        |       | 52  | HID | HIE    | 12.263 |
|        |       | 29  | HID | HIE    | 12.623 |
|        |       | 177 | ASH | ASP    | 13.754 |
|        |       | 117 | HID | HIE    | 14.124 |
|        |       | 119 | HID | HIE    | 15.719 |
|        |       | 267 | HID | HIE    | 16.510 |
|        |       | 121 | HID | HIE    | 16.793 |
|        |       | 122 | HID | HIE    | 16.896 |
|        |       | 71  | HID | HIE    | 21.643 |
|        |       | 199 | HID | HIE    | 23.730 |
|        | MAP17 | 28  | HID | HIE    | 13.175 |
|        |       | 63  | HID | HIE    | 13.844 |
|        |       | 62  | HID | HIE    | 14.691 |
|        |       | 127 | HID | HIE    | 17.070 |
|        |       | 131 | HID | HIE    | 20.561 |
|        |       | 132 | HID | HIE    | 20.894 |
|        |       | 81  | HID | HIE    | 23.533 |
|        | MAP18 | 278 | HID | HIE    | 10.908 |
|        |       | 62  | HID | HIE    | 12.897 |
|        |       | 127 | HID | HIE    | 15.879 |
|        |       | 129 | HID | HIE    | 16.899 |
|        |       | 131 | HID | HIE    | 17.621 |
|        |       | 132 | HID | HIE    | 17.796 |
|        |       | 81  | HID | HIE    | 21.379 |
|        | 210   | HID | HIE | 22.405 |        |
|        | MAP19 | 130 | HID | HIE    | 8.213  |
|        |       | 58  | HID | HIE    | 11.251 |
|        |       | 29  | HID | HIE    | 12.532 |
|        |       | 57  | HID | HIE    | 12.658 |
|        |       | 122 | HID | HIE    | 14.698 |
|        |       | 272 | HID | HIE    | 15.811 |
|        |       | 126 | HID | HIE    | 16.641 |
|        |       | 127 | HID | HIE    | 16.767 |
| 76     |       | HID | HIE | 20.990 |        |
| 204    |       | HID | HIE | 22.736 |        |

|     |      |      |     |        |        |
|-----|------|------|-----|--------|--------|
| IE  | 2wbg | 164  | GLH | GLU    | 2.394  |
|     |      | 403  | GLH | GLU    | 2.628  |
|     |      | 296  | HID | HIE    | 3.549  |
|     |      | 178  | HID | HIE    | 6.418  |
|     |      | 376  | HID | HIE    | 10.739 |
|     |      | 173  | HID | HIE    | 13.657 |
|     |      | 34   | HID | HIE    | 13.956 |
|     |      | 55   | HID | HIE    | 13.982 |
|     |      | 199  | HID | HIE    | 15.290 |
|     |      | 38   | HIP | HIE    | 17.019 |
|     |      | 365  | HIP | HIE    | 19.602 |
|     | 3ao4 | 255  | HID | HIE    | 2.945  |
|     |      | 253  | HID | HIE    | 6.659  |
|     |      | 117  | HID | HIE    | 16.894 |
|     |      | 58   | HID | HIE    | 17.161 |
|     |      | 197  | HID | HIE    | 20.278 |
|     |      | 150  | HIP | HIE    | 22.237 |
|     |      | 103  | HID | HIE    | 26.669 |
|     |      | 11   | HIP | HIE    | 26.821 |
|     | 3owj | 158  | HID | HIE    | 3.441  |
|     |      | 113  | HID | HIE    | 3.970  |
|     |      | 166  | HIP | HIE    | 12.907 |
|     |      | 27   | HID | HIE    | 18.148 |
|     |      | 232  | HID | HIE    | 19.538 |
|     |      | 234  | HID | HIE    | 21.185 |
|     |      | 181  | HID | HIE    | 24.029 |
|     |      | 307  | HID | HIE    | 26.193 |
|     |      | 284  | HID | HIE    | 28.653 |
|     |      | 16   | HID | HIE    | 29.528 |
|     |      | 2x00 | 198 | CYX    | CYS    |
|     | 199  |      | CYX | CYS    | 4.573  |
|     | 195  |      | HID | HIE    | 7.236  |
|     | 135  |      | CYX | CYS    | 10.876 |
| 148 | CYX  |      | CYS | 11.567 |        |
| 119 | HID  |      | HIE | 30.552 |        |
| 9   | HID  |      | HIE | 43.907 |        |

|      |      |     |     |        |        |
|------|------|-----|-----|--------|--------|
| IE   | 3kgp | 188 | CYX | CYS    | 3.692  |
|      |      | 216 | CYX | CYS    | 4.249  |
|      |      | 42  | HID | HIE    | 5.089  |
|      |      | 88  | HID | HIE    | 7.202  |
|      |      | 27  | CYX | CYS    | 7.310  |
|      |      | 43  | CYX | CYS    | 7.784  |
|      |      | 177 | CYX | CYS    | 9.045  |
|      |      | 161 | CYX | CYS    | 10.527 |
|      |      | 89  | HID | HIE    | 12.384 |
|      |      | 129 | CYX | CYS    | 12.928 |
|      |      | 165 | HID | HIE    | 13.947 |
|      |      | 198 | CYX | CYS    | 14.688 |
|      |      | 158 | HID | HIE    | 15.891 |
|      |      | 80  | HID | HIE    | 17.107 |
|      |      | 22  | HID | HIE    | 17.295 |
|      |      | 230 | HID | HIE    | 18.056 |
|      |      | 238 | HID | HIE    | 22.922 |
|      | 35   | CYX | CYS | 23.769 |        |
|      | 104  | CYX | CYS | 27.676 |        |
|      | 2zjw | 160 | HID | HIE    | 5.030  |
|      |      | 115 | HID | HIE    | 5.912  |
|      |      | 168 | HIP | HIE    | 12.976 |
|      |      | 29  | HID | HIE    | 16.592 |
|      |      | 234 | HID | HIE    | 20.058 |
|      |      | 183 | HID | HIE    | 20.781 |
|      |      | 236 | HID | HIE    | 22.029 |
|      |      | 309 | HID | HIE    | 25.190 |
|      |      | 18  | HID | HIE    | 27.659 |
|      |      | 286 | HID | HIE    | 28.672 |
|      |      | 276 | HID | HIE    | 35.096 |
|      | 2xdl | 61  | HID | HIE    | 9.487  |
|      |      | 173 | HID | HIE    | 12.887 |
|      | 4des | 47  | HIP | HIE    | 9.537  |
|      |      | 79  | HID | HIE    | 13.516 |
|      |      | 81  | HIP | HIE    | 15.093 |
|      |      | 22  | HID | HIE    | 17.001 |
|      | 3k5v | 266 | HIP | HIE    | 10.095 |
| 137  |      | HIP | HIE | 17.904 |        |
| 172  |      | HID | HIE | 27.423 |        |
| 23   |      | HID | HIE | 31.680 |        |
| 2vw5 | 197  | HID | HIE | 14.401 |        |
| 2iwx | 197  | HID | HIE | 14.420 |        |
| 2brb | 181  | HIP | HIE | 23.721 |        |
|      | 239  | HID | HIE | 29.679 |        |

Table S3: experimental and estimated free energies for all receptor ligand systems using a second order expansion with a 3Å RMSD cutoff and without the inclusion of ligand external or site entropy. All values are reported in kcal/mol.

| Set          | Ligand | Experimental | 1       | 2      | 3      | 4        | EXP    | 1 + NM |
|--------------|--------|--------------|---------|--------|--------|----------|--------|--------|
| bromodomains | 3MXF   | -9.6         | -39.64  | -29.50 | -25.43 | -15.81   | -28.20 | -17.20 |
|              | 4OGJ   | -8.9         | -71.59  | -27.25 | 166.98 | 1107.51  | -44.34 | -52.79 |
|              | 3SVG   | -7.3         | -26.02  | -17.52 | -17.71 | -19.20   | -19.61 | -4.63  |
|              | 3U5J   | -7.4         | -24.24  | -6.12  | -6.78  | -45.91   | -17.28 | -6.37  |
|              | 4MR3   | -9.0         | -37.87  | -19.62 | -43.26 | -24.09   | -27.64 | -21.79 |
|              | 4MR4   | -7.8         | -33.15  | -15.38 | -36.08 | 30.36    | -22.22 | -14.06 |
|              | 3U5L   | -8.2         | -35.63  | -16.92 | -17.55 | -60.40   | -21.82 | -15.48 |
|              | 4J0R   | -8.8         | -29.27  | -17.61 | -18.89 | -9.75    | -20.54 | -8.30  |
| FXR          | 1ymrc  | -11.56       | -57.16  | -47.12 | -45.25 | -44.54   | -47.30 | -34.40 |
|              | 1kjyp  | -6.54        | -89.76  | -41.50 | 93.03  | 1437.06  | -52.00 | -56.71 |
|              | 1yfjn  | -6.67        | -79.29  | -46.45 | -20.34 | 21.31    | -53.81 | -48.38 |
|              | 1rtaz  | -5.93        | -75.40  | -57.41 | -32.30 | 68.74    | -53.43 | -45.51 |
|              | 1rzch  | -5.67        | -66.96  | -55.50 | -52.24 | -50.79   | -55.41 | -41.68 |
|              | 1wles  | -5.39        | -72.70  | -54.29 | -45.74 | -25.36   | -30.48 | -41.75 |
|              | 1skpl  | -6.63        | -64.65  | -49.63 | -47.10 | -46.00   | -52.10 | -36.15 |
|              | 1nqqw  | -9.33        | -66.64  | -56.55 | -50.46 | -45.06   | -55.43 | -43.56 |
|              | 1wgph  | -6.43        | -79.16  | -58.33 | -41.20 | 7.88     | -56.27 | -48.57 |
|              | 1luxjy | -5.47        | -68.02  | -51.95 | -46.59 | -46.98   | -55.75 | -42.24 |
|              | 1zhbd  | -7.90        | -56.97  | -45.56 | -43.62 | -48.18   | -47.55 | -33.22 |
|              | 1dqzc  | -7.38        | -70.49  | -51.46 | -66.19 | -40.90   | -57.04 | -43.72 |
|              | 1rwui  | -5.42        | -65.80  | -52.79 | -48.96 | -49.13   | -54.69 | -39.36 |
|              | 1rfr   | -6.81        | -66.61  | -55.14 | -52.22 | -54.75   | -55.50 | -42.13 |
|              | 1ivlk  | -10.24       | -69.57  | -43.87 | -72.04 | -22.73   | -51.73 | -42.64 |
|              | 1jski  | -5.92        | -64.20  | -55.91 | -54.23 | -53.73   | -56.31 | -40.65 |
|              | 1kmrz  | -6.39        | -74.76  | -30.18 | 4.28   | -320.89  | -54.35 | -41.44 |
|              | 1ifba  | -6.58        | -68.23  | -57.89 | -54.38 | -48.40   | -41.96 | -41.51 |
|              | 1hvih  | -10.20       | -58.25  | -47.25 | -48.59 | -41.40   | -48.13 | -31.68 |
|              | 1xivt  | -8.07        | -65.78  | -56.41 | -53.40 | -52.08   | -53.91 | -39.39 |
|              | 1ixdk  | -7.20        | -112.75 | -82.46 | -65.28 | -8.41    | -83.11 | -79.00 |
|              | 1fggu  | -5.35        | -61.11  | 22.40  | -87.03 | -1791.79 | -43.98 | -36.68 |
|              | 1btoj  | -10.64       | -75.80  | -29.52 | 11.67  | -456.49  | -54.34 | -45.06 |
|              | 1hqmf  | -8.09        | -79.91  | -33.48 | 174.47 | 741.65   | -54.00 | -47.91 |
|              | 1lrpw  | -8.44        | -51.80  | -42.93 | -40.65 | -41.22   | -42.01 | -28.43 |
|              | 1pdbc  | -9.41        | -55.56  | -49.11 | -47.84 | -46.93   | -48.08 | -34.22 |
| 1hoia        | -6.30  | -70.86       | -43.68  | -14.63 | 21.84  | -52.48   | -44.39 |        |
| 1ytut        | -9.33  | -66.55       | -55.00  | -53.25 | -51.68 | -47.53   | -38.35 |        |
| 1lkvm        | -8.61  | -65.82       | -54.61  | -51.24 | -50.88 | -54.53   | -37.05 |        |
| 1xxar        | -6.97  | -82.49       | -63.26  | -45.18 | -2.69  | -61.91   | -51.39 |        |
| 1fymf        | -5.41  | -83.38       | -60.74  | -31.74 | 89.40  | -57.11   | -56.68 |        |



| Set      | Ligand              | Experimental | 1      | 2      | 3      | 4       | EXP     | 1 + NM |
|----------|---------------------|--------------|--------|--------|--------|---------|---------|--------|
| hPNMT    | 2G70                | -10.6        | -47.18 | -37.94 | -33.18 | -22.18  | -32.26  | -25.13 |
|          | 2G71                | -9.1         | -66.27 | -51.54 | -43.96 | -33.48  | -52.60  | -42.26 |
|          | 2G72                | -10.2        | -74.88 | -46.59 | -54.84 | -39.81  | -57.33  | -51.65 |
|          | 1HNN                | -9.4         | -50.38 | -38.19 | -34.13 | -34.90  | -36.40  | -26.91 |
|          | 2ONY                | -10.6        | -72.00 | -59.51 | -59.42 | -41.47  | -60.54  | -46.48 |
|          | 1N7J                | -10.1        | -44.87 | -38.08 | -37.66 | -36.68  | -37.86  | -27.35 |
|          | 2G8N                | -10.1        | -68.76 | -51.27 | -48.35 | -49.18  | -55.39  | -45.09 |
| Lysozyme | 181L                | -5.19        | -15.12 | -13.49 | -12.96 | -12.70  | -12.58  | -2.81  |
|          | 182L                | -5.42        | -19.56 | -16.90 | -16.04 | -15.93  | -16.29  | -7.04  |
|          | 183L                | -5.09        | -20.19 | -17.26 | -16.96 | -16.88  | -16.56  | -6.86  |
|          | 184L                | -6.48        | -25.66 | -22.40 | -21.67 | -21.20  | -19.99  | -10.58 |
|          | 185L                | -4.89        | -19.44 | -16.78 | -16.34 | -16.33  | -16.55  | -7.84  |
|          | 186L                | -6.70        | -27.00 | -24.38 | -23.52 | -23.02  | -22.84  | -13.17 |
|          | 187L                | -4.67        | -20.06 | -17.69 | -17.29 | -16.97  | -16.06  | -5.65  |
|          | 188L                | -4.60        | -21.33 | -17.88 | -18.36 | -17.95  | -170.00 | -9.20  |
|          | 1NHB                | -5.76        | -20.90 | -18.73 | -18.12 | -17.82  | -16.72  | -7.11  |
| MAP4k4   | MAP01               | -11.56       | -85.40 | -51.56 | 109.42 | 2406.04 | -44.90  | -71.30 |
|          | MAP02               | -11.30       | -54.88 | -30.80 | -45.34 | 49.49   | -42.12  | -30.80 |
|          | MAP03               | -7.75        | -29.25 | -23.93 | -22.92 | -22.29  | -22.20  | -14.59 |
|          | MAP04               | -8.24        | -29.21 | -15.95 | -8.55  | -35.53  | -20.50  | -13.95 |
|          | MAP05               | -10.97       | -38.92 | -30.06 | -26.99 | -26.94  | -30.80  | -19.24 |
|          | MAP06               | -9.77        | -38.48 | -28.40 | -28.57 | -25.37  | -27.81  | -18.14 |
|          | MAP07               | -11.29       | -43.21 | -32.48 | -28.96 | -32.50  | -34.41  | -23.61 |
|          | MAP08               | -9.60        | -46.46 | -36.00 | -33.60 | -32.78  | -36.23  | -29.82 |
|          | MAP09               | -10.53       | -51.72 | -41.70 | -37.42 | -37.20  | -40.08  | -32.65 |
|          | MAP11               | -10.50       | -42.02 | -22.10 | 2.07   | -6.16   | -27.29  | -31.97 |
|          | MAP12               | -11.5        | -57.59 | -43.16 | -46.35 | -52.96  | -47.33  | -31.55 |
|          | MAP13               | -7.91        | -49.09 | -31.36 | -44.32 | -42.05  | -37.00  | -26.20 |
|          | MAP14               | -9.68        | -66.58 | -22.86 | -20.94 | -396.60 | -48.73  | -39.62 |
|          | MAP15               | -10.87       | -46.38 | -36.87 | -33.91 | -32.83  | -36.40  | -22.77 |
|          | MAP16               | -9.86        | -53.82 | -43.66 | -39.75 | -35.79  | -43.36  | -29.84 |
|          | MAP17               | -6.86        | -38.16 | -27.48 | -25.09 | -21.28  | -27.09  | -18.63 |
|          | MAP18               | -9.41        | -48.98 | -38.49 | -36.11 | -32.42  | -39.40  | -38.70 |
|          | MAP19               | -11.68       | -43.79 | -33.61 | -32.18 | -32.35  | -33.23  | -25.17 |
|          | Interaction Entropy | 2WBG         | -6.15  | -57.41 | -30.23 | 14.83   | 225.16  | -37.36 |
| 2IWX     |                     | -9.23        | -39.43 | -30.83 | -28.25 | -23.47  | -29.44  | -19.57 |
| 3KGP     |                     | -3.55        | -50.80 | -13.20 | 3.06   | -67.41  | -32.29  | -30.12 |
| 4DEW     |                     | -9.67        | -14.94 | -6.94  | 0.27   | 15.36   | -7.87   | 6.09   |
| 3K5V     |                     | -8.71        | -37.54 | -22.84 | -21.32 | -27.42  | -27.02  | -19.34 |
| 2BRB     |                     | -6.72        | -38.97 | -25.60 | -23.98 | -29.61  | -26.89  | -21.58 |
| 2XDL     |                     | -4.29        | -34.05 | -26.73 | -26.01 | -23.07  | -26.25  | -13.30 |
| 4DES     |                     | -8.09        | -14.51 | -8.97  | -10.36 | -19.61  | -12.12  | -0.38  |
| 3OWJ     |                     | -8.38        | -34.36 | -22.49 | -10.15 | -28.74  | -28.01  | -26.96 |
| 2VW5     |                     | -11.77       | -52.44 | -36.93 | -33.67 | -31.66  | -39.06  | -27.66 |
| 2ZJW     |                     | -10.64       | -23.56 | -17.73 | -14.60 | -14.34  | -18.11  | -5.43  |
| 2X00     |                     | -15.65       | -32.39 | -18.37 | -16.55 | -27.75  | -24.10  | -16.39 |
| 3AO4     |                     | -2.86        | -24.44 | -14.87 | -5.94  | -23.77  | -18.94  | -14.42 |
| 2YGE     |                     | -7.00        | -50.98 | -34.31 | -31.15 | -26.68  | -36.41  | -22.57 |

Table S4: **Correlation metrics for calculations from Duan et al.**<sup>4</sup>. In this paper, MD simulations were run either with restraints for 2 ns or unconstrained for 6 ns. Free energies were calculated by normal modes (NM) or interaction entropy (IE), the latter of which is numerically equivalent to the exponential average.

|      |    | R            | $\rho$       | $\tau$       |
|------|----|--------------|--------------|--------------|
| 2 ns | NM | -0.11 (0.25) | -0.08 (0.28) | -0.03 (0.22) |
|      | IE | 0.22 (0.25)  | 0.35 (0.25)  | 0.2 (0.19)   |
| 6 ns | NM | 0.31 (0.32)  | 0.13 (0.28)  | 0.1 (0.21)   |
|      | IE | 0.08 (0.29)  | -0.07 (0.31) | -0.1 (0.24)  |

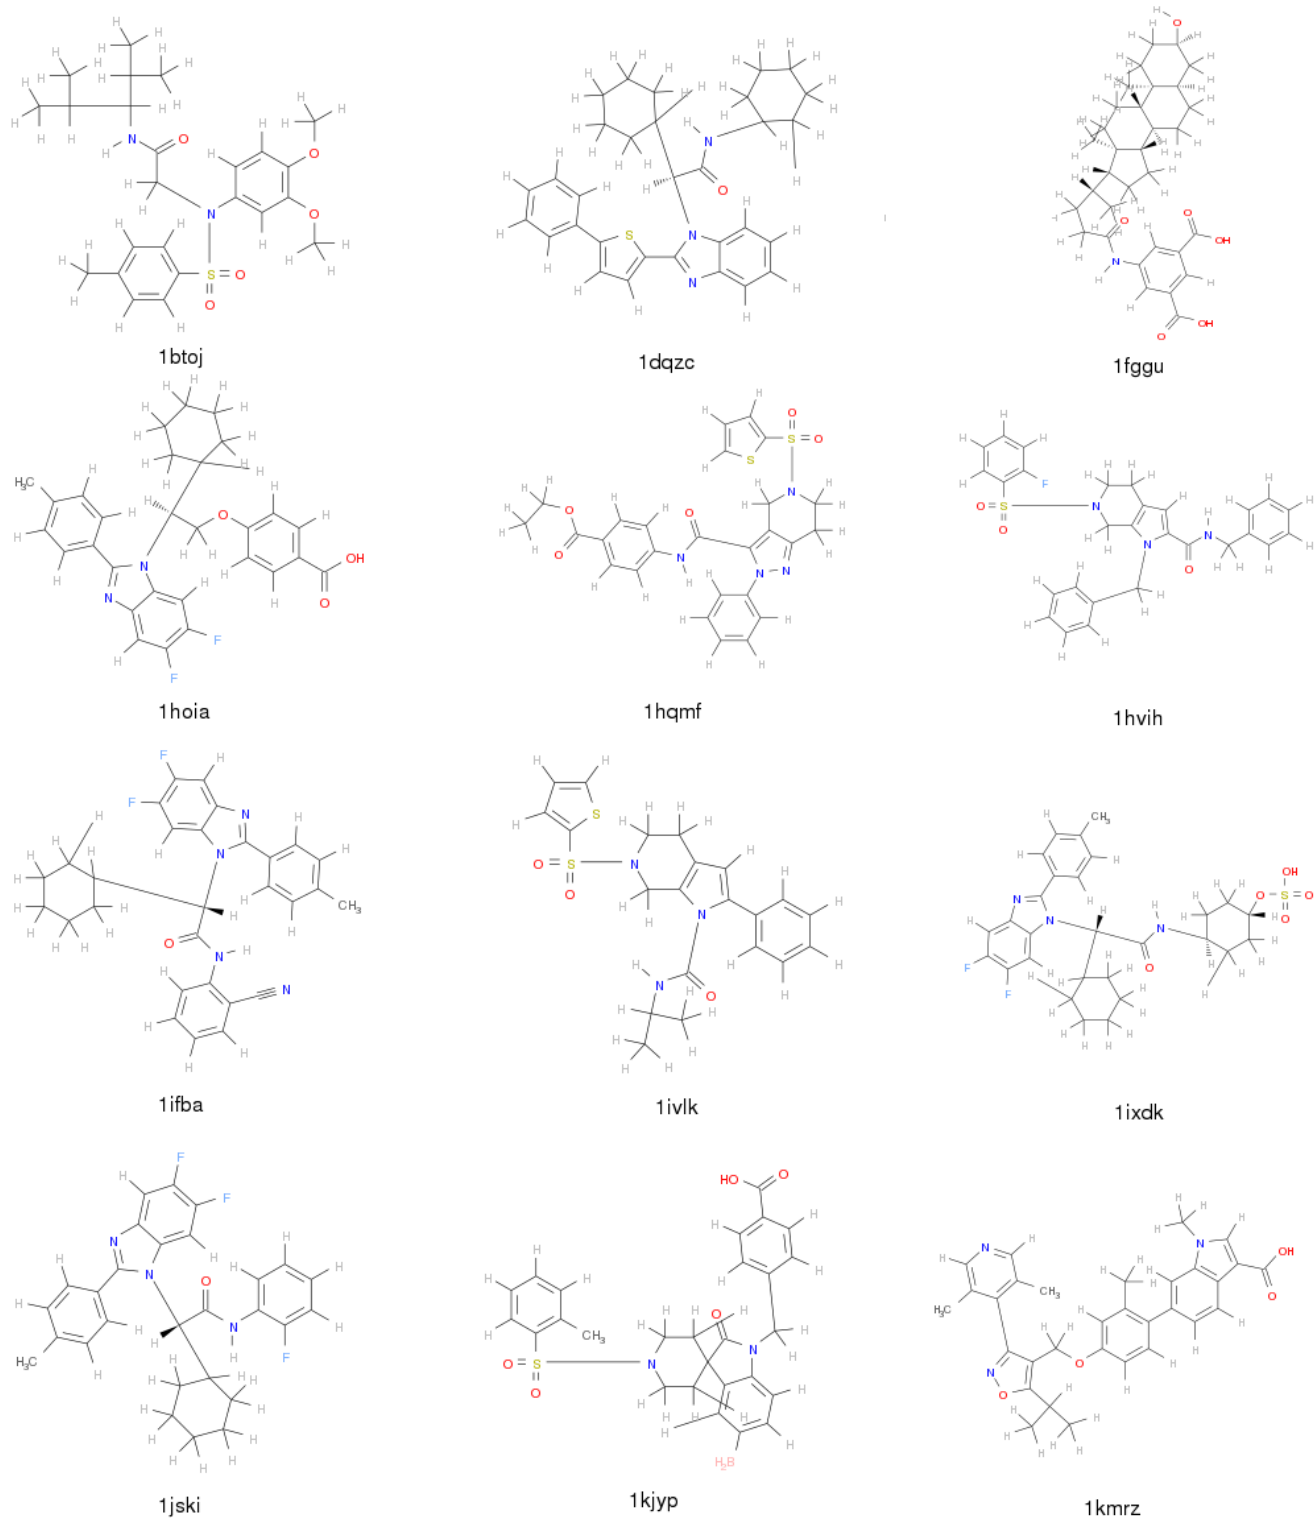

Figure S1: **Chemical structures of all ligands showing their protonation state, labeled by an identifier for the complex.** Diagrams were generated using Open Babel 2.3.2<sup>5</sup>

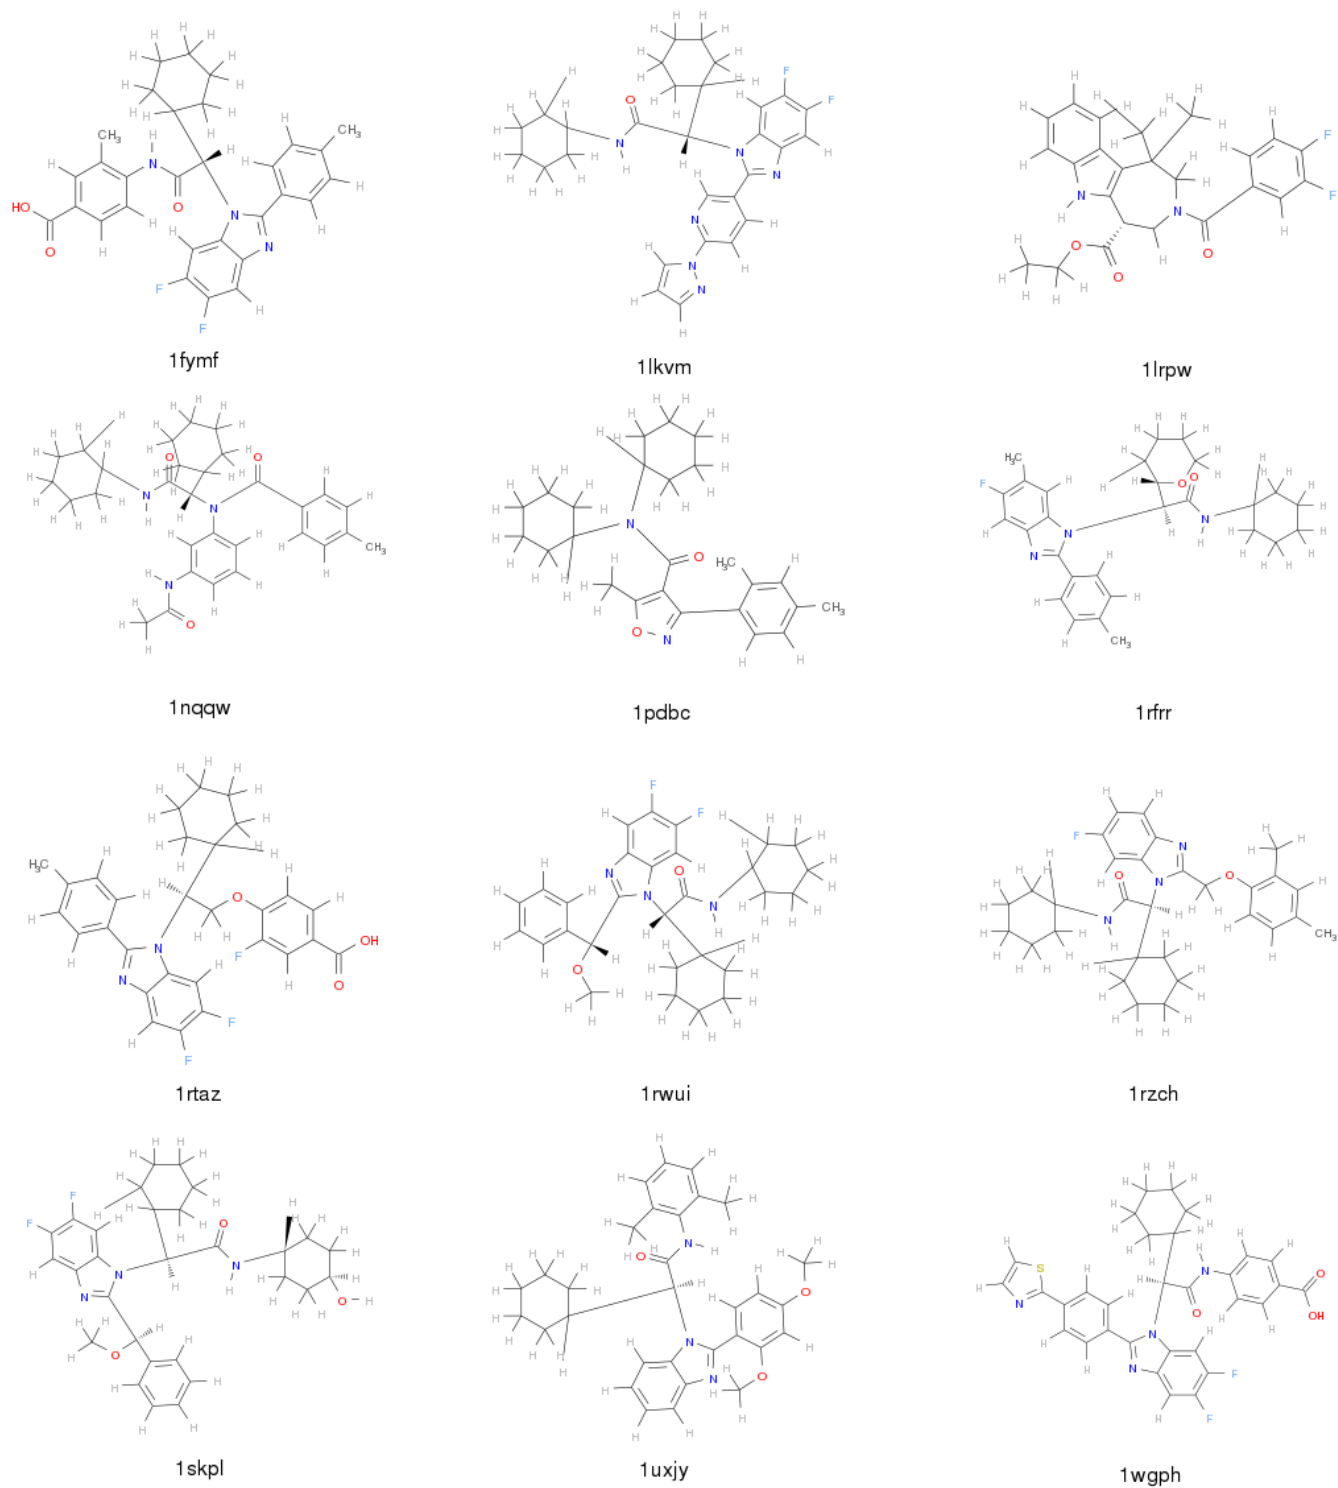

Figure S1: **Chemical structures of all ligands showing their protonation state, labeled by an identifier for the complex.** Diagrams were generated using Open Babel 2.3.2<sup>5</sup>

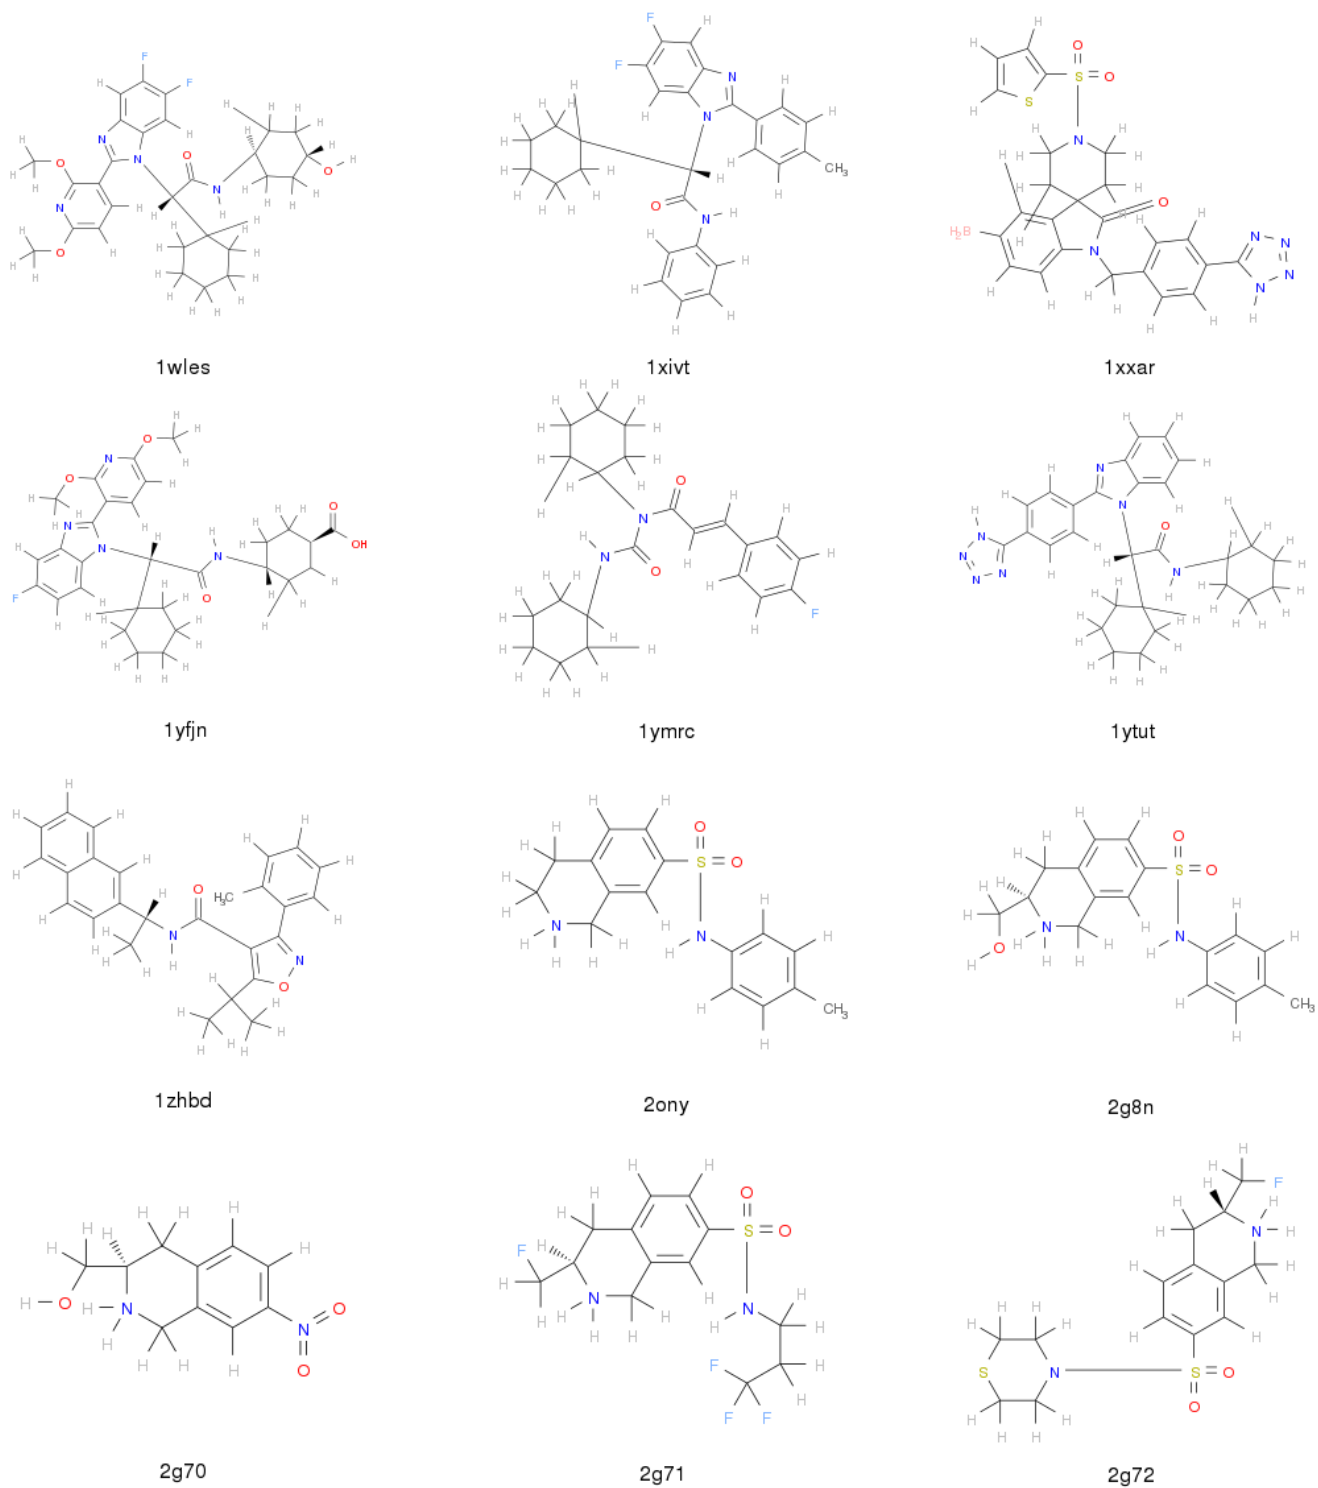

Figure S1: **Chemical structures of all ligands showing their protonation state, labeled by an identifier for the complex.** Diagrams were generated using Open Babel 2.3.2<sup>5</sup>

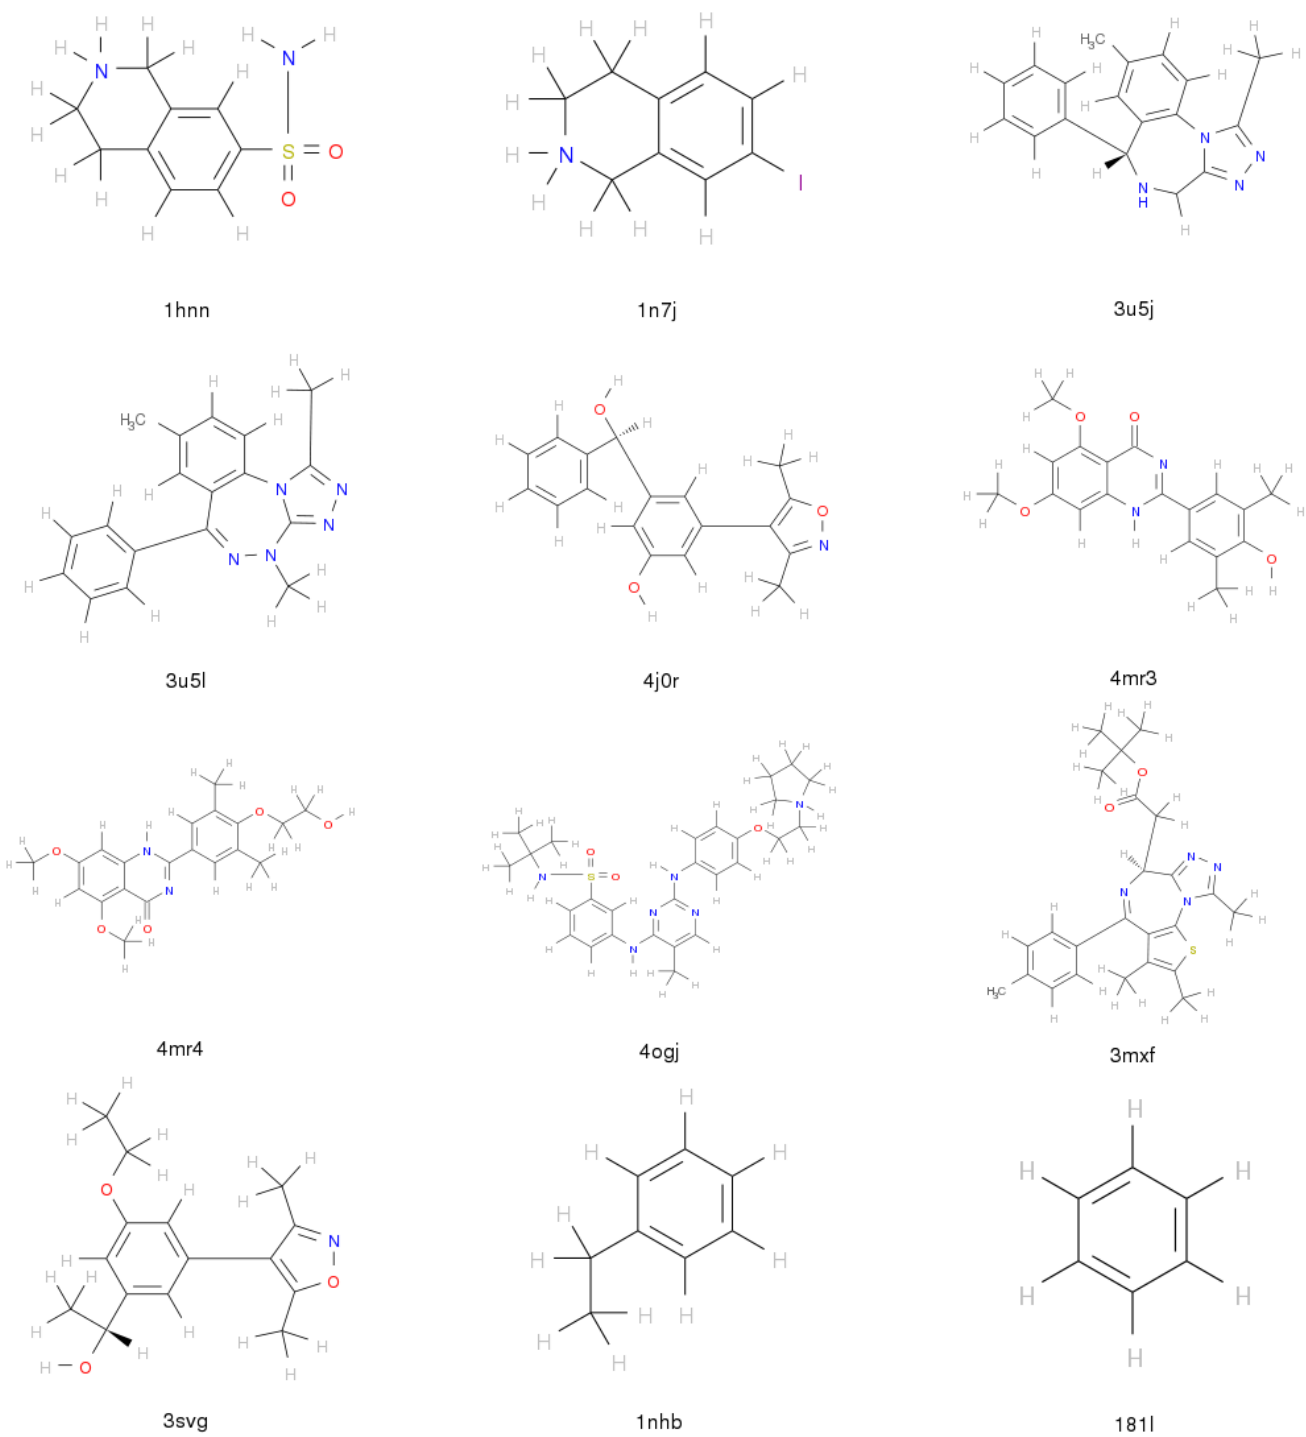

Figure S1: **Chemical structures of all ligands showing their protonation state, labeled by an identifier for the complex.** Diagrams were generated using Open Babel 2.3.2<sup>5</sup>

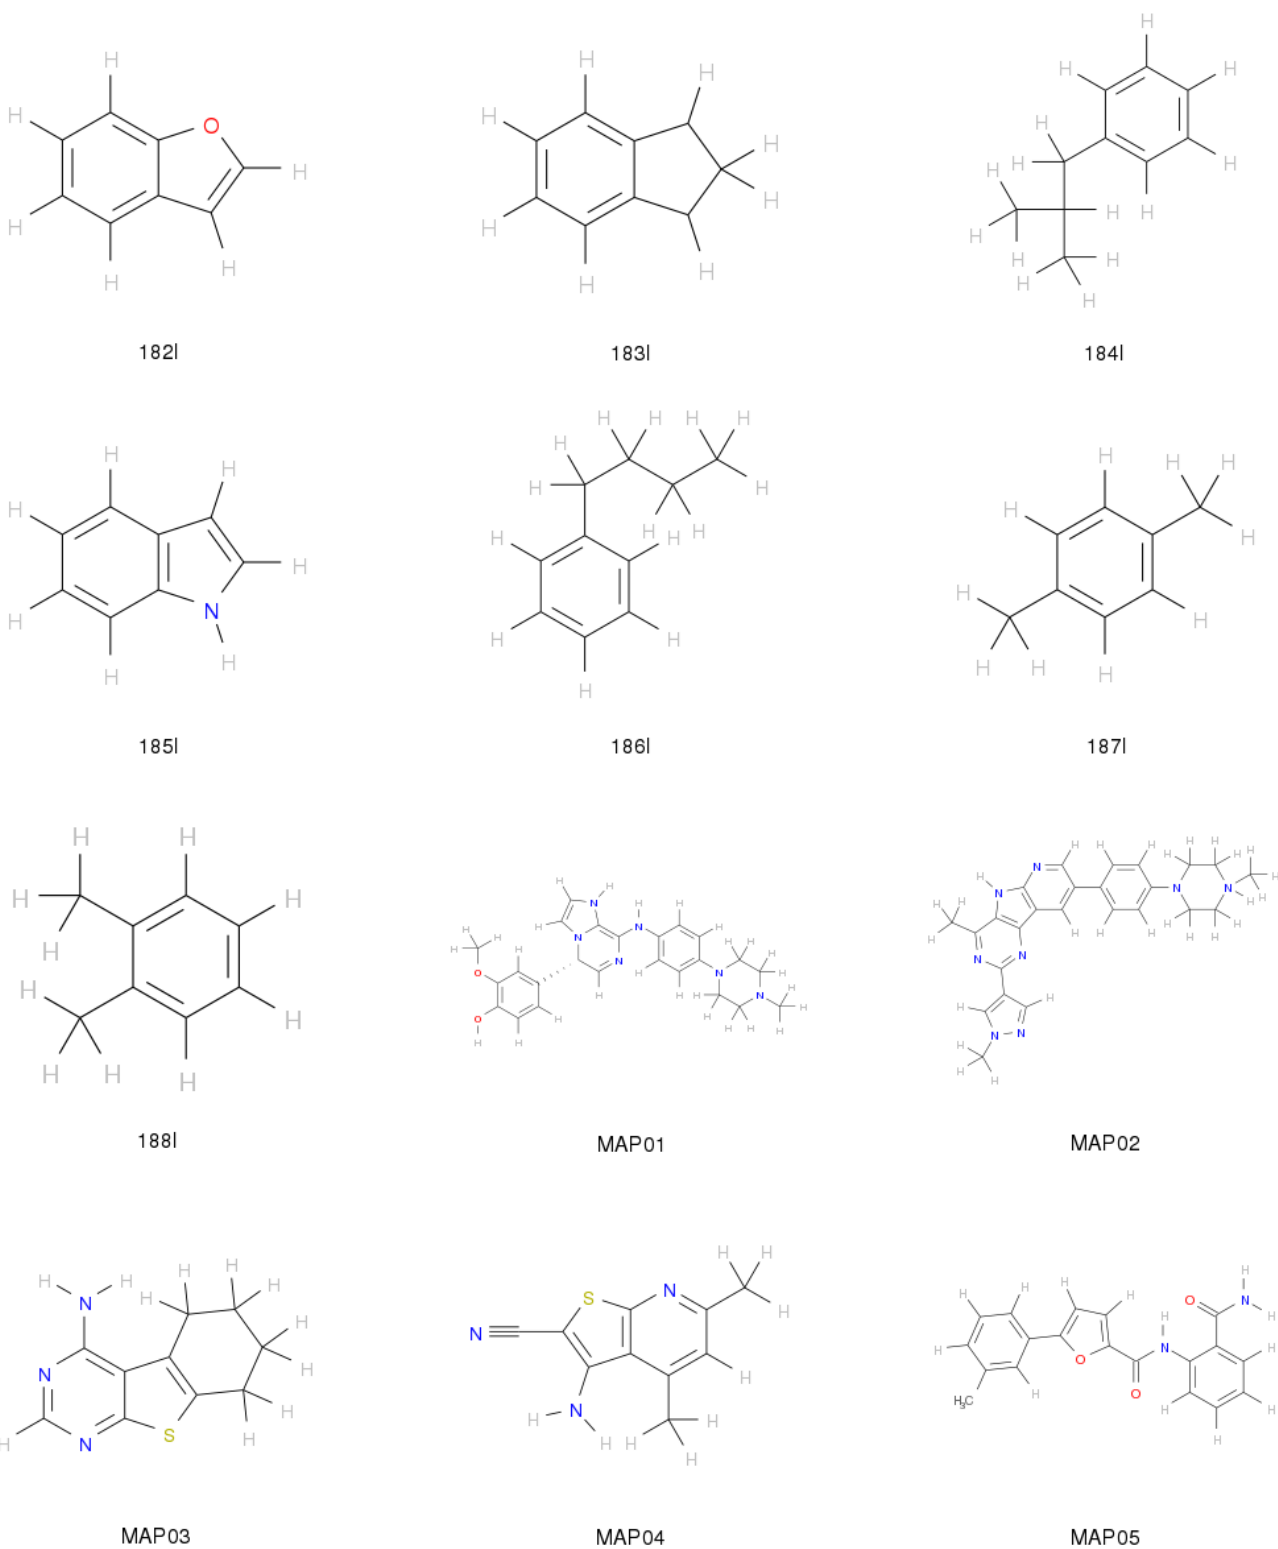

Figure S1: **Chemical structures of all ligands showing their protonation state, labeled by an identifier for the complex.** Diagrams were generated using Open Babel 2.3.2<sup>5</sup>

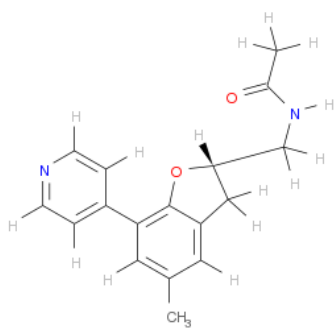

MAP06

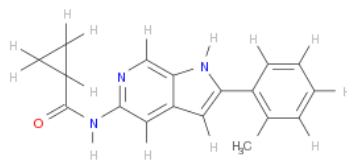

MAP07

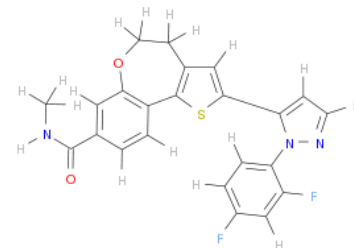

MAP12

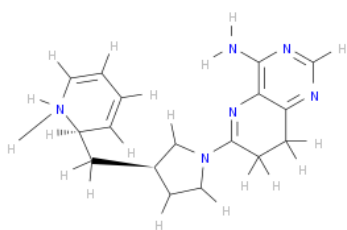

MAP16

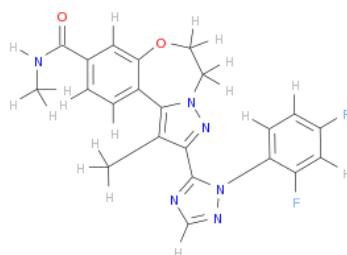

MAP17

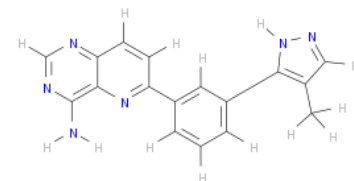

MAP19

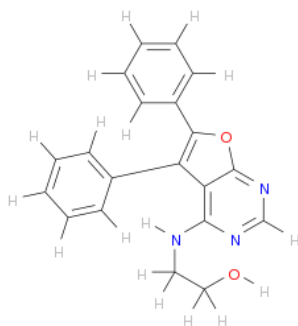

2brb

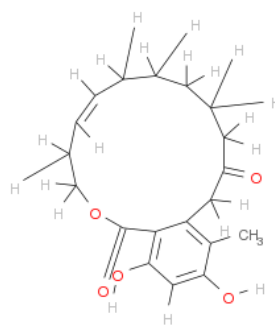

2iwx

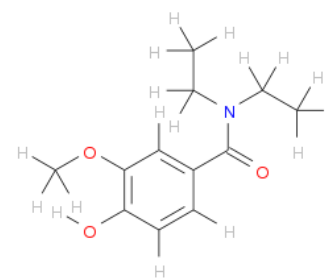

2xdl

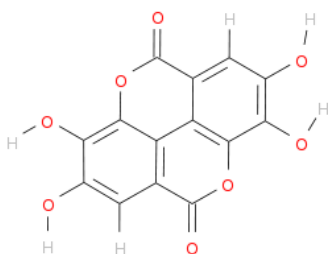

2zjw

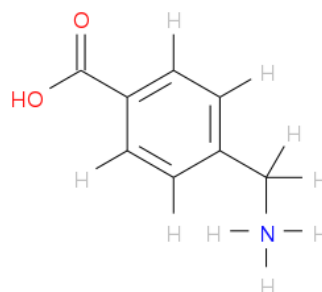

3kjp

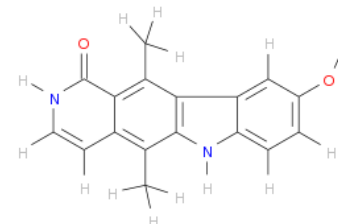

3owj

Figure S1: **Chemical structures of all ligands showing their protonation state, labeled by an identifier for the complex.** Diagrams were generated using Open Babel 2.3.2<sup>5</sup>



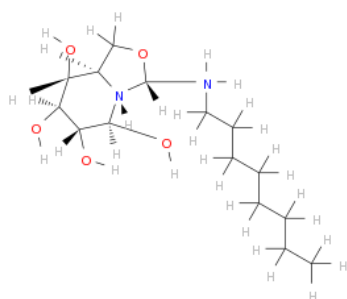

2wbg

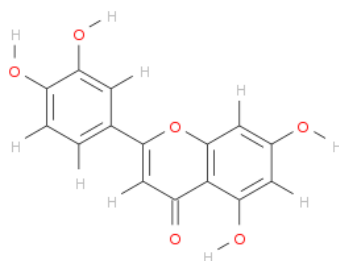

4dew

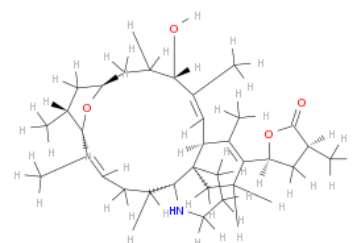

2x00

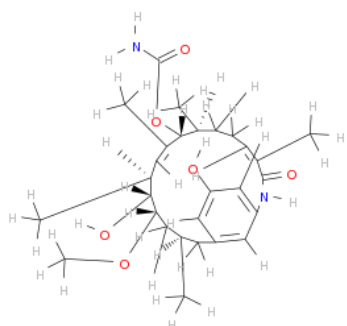

2vw5

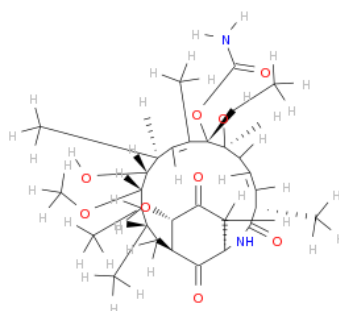

2yge

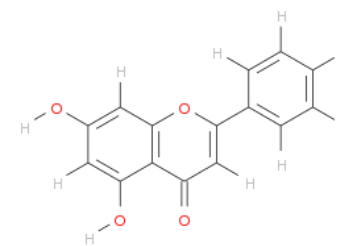

4des

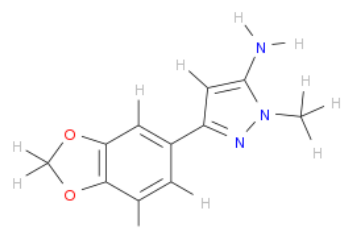

3ao4

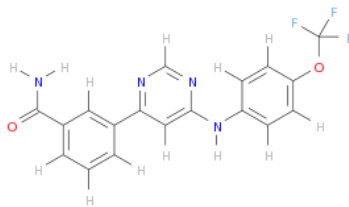

3k5v

Figure S1: **Chemical structures of all ligands showing their protonation state, labeled by an identifier for the complex.** Diagrams were generated using Open Babel 2.3.2<sup>5</sup>

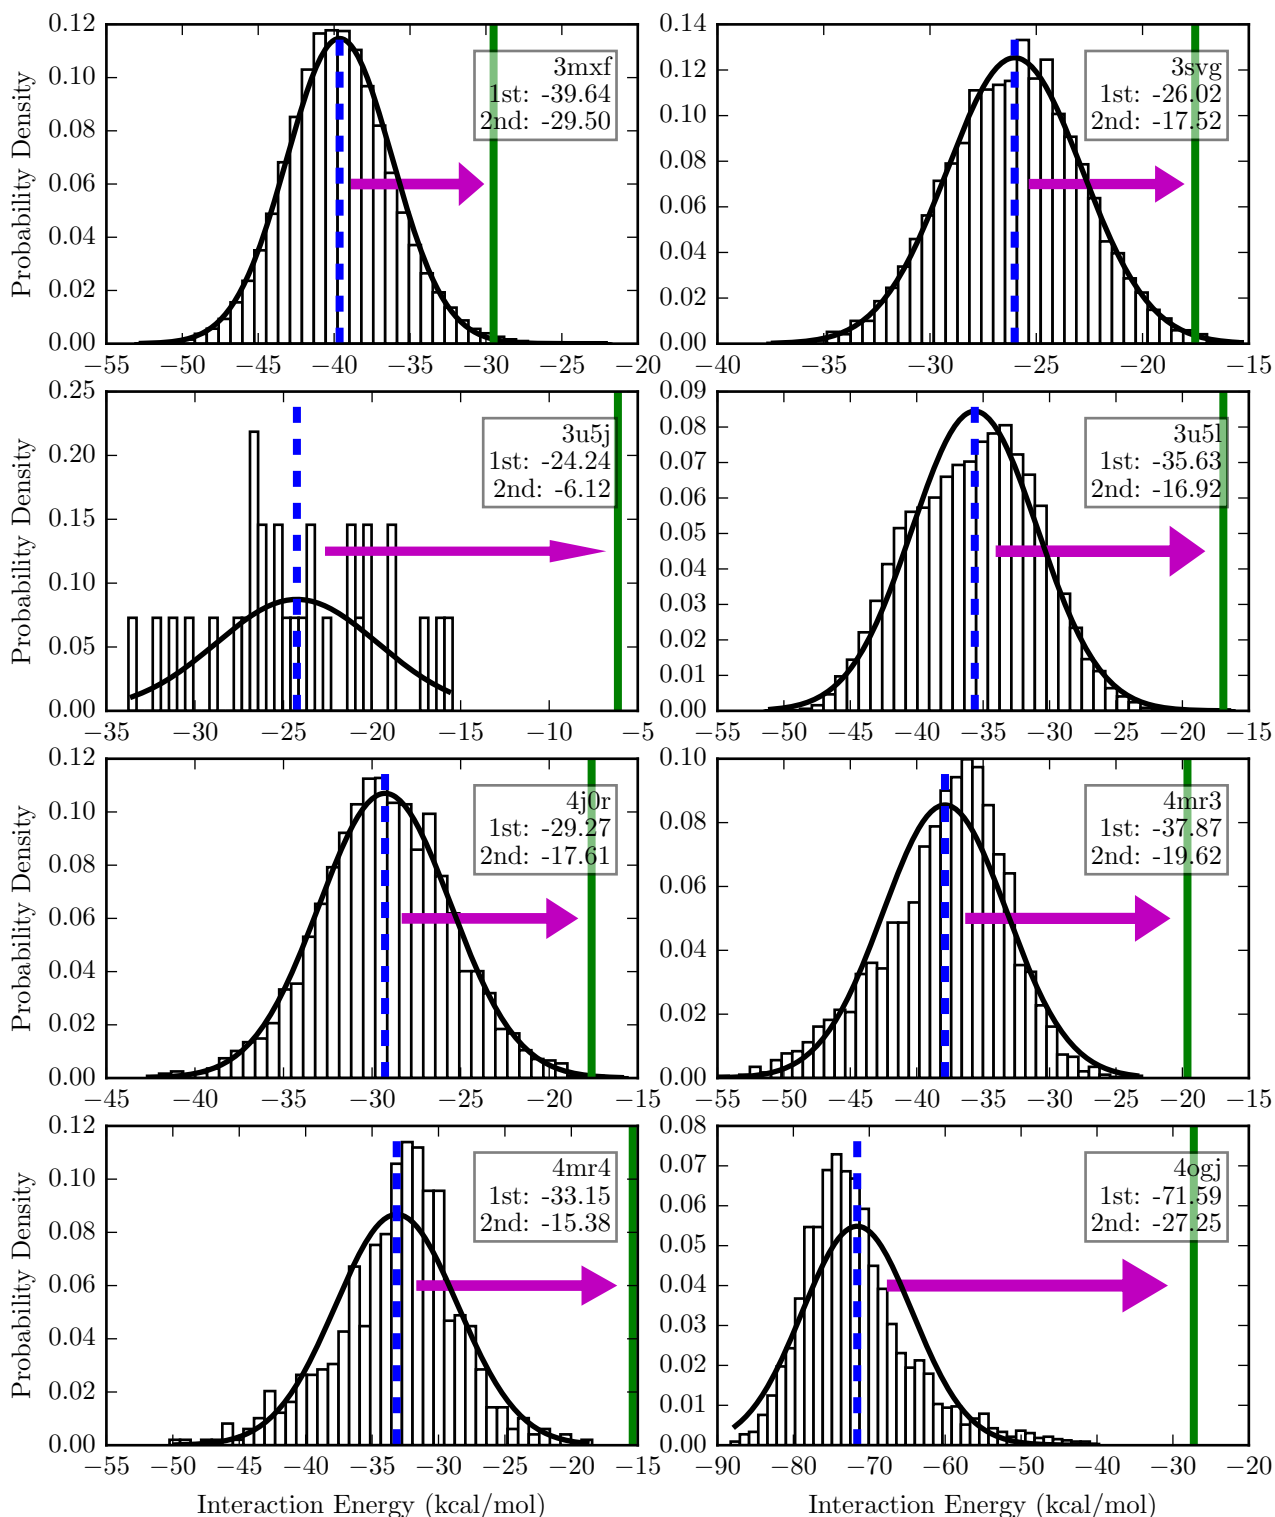

Figure S2: The bars are a normalized histogram of interaction energies observed in simulations of protein-ligand complexes (after ligand RMSD filtering): 3mxf, 3svg, 3u5j, 3u5l, 4j0r, 4mr3, 4mr4, 4ogj from the bromodomains dataset. The mean interaction energy is shown with a dashed blue vertical line. The second-order truncation of the cumulant expansion is shown with a solid green line. A Gaussian distribution based on the sample mean and standard deviation is shown as a solid black line.

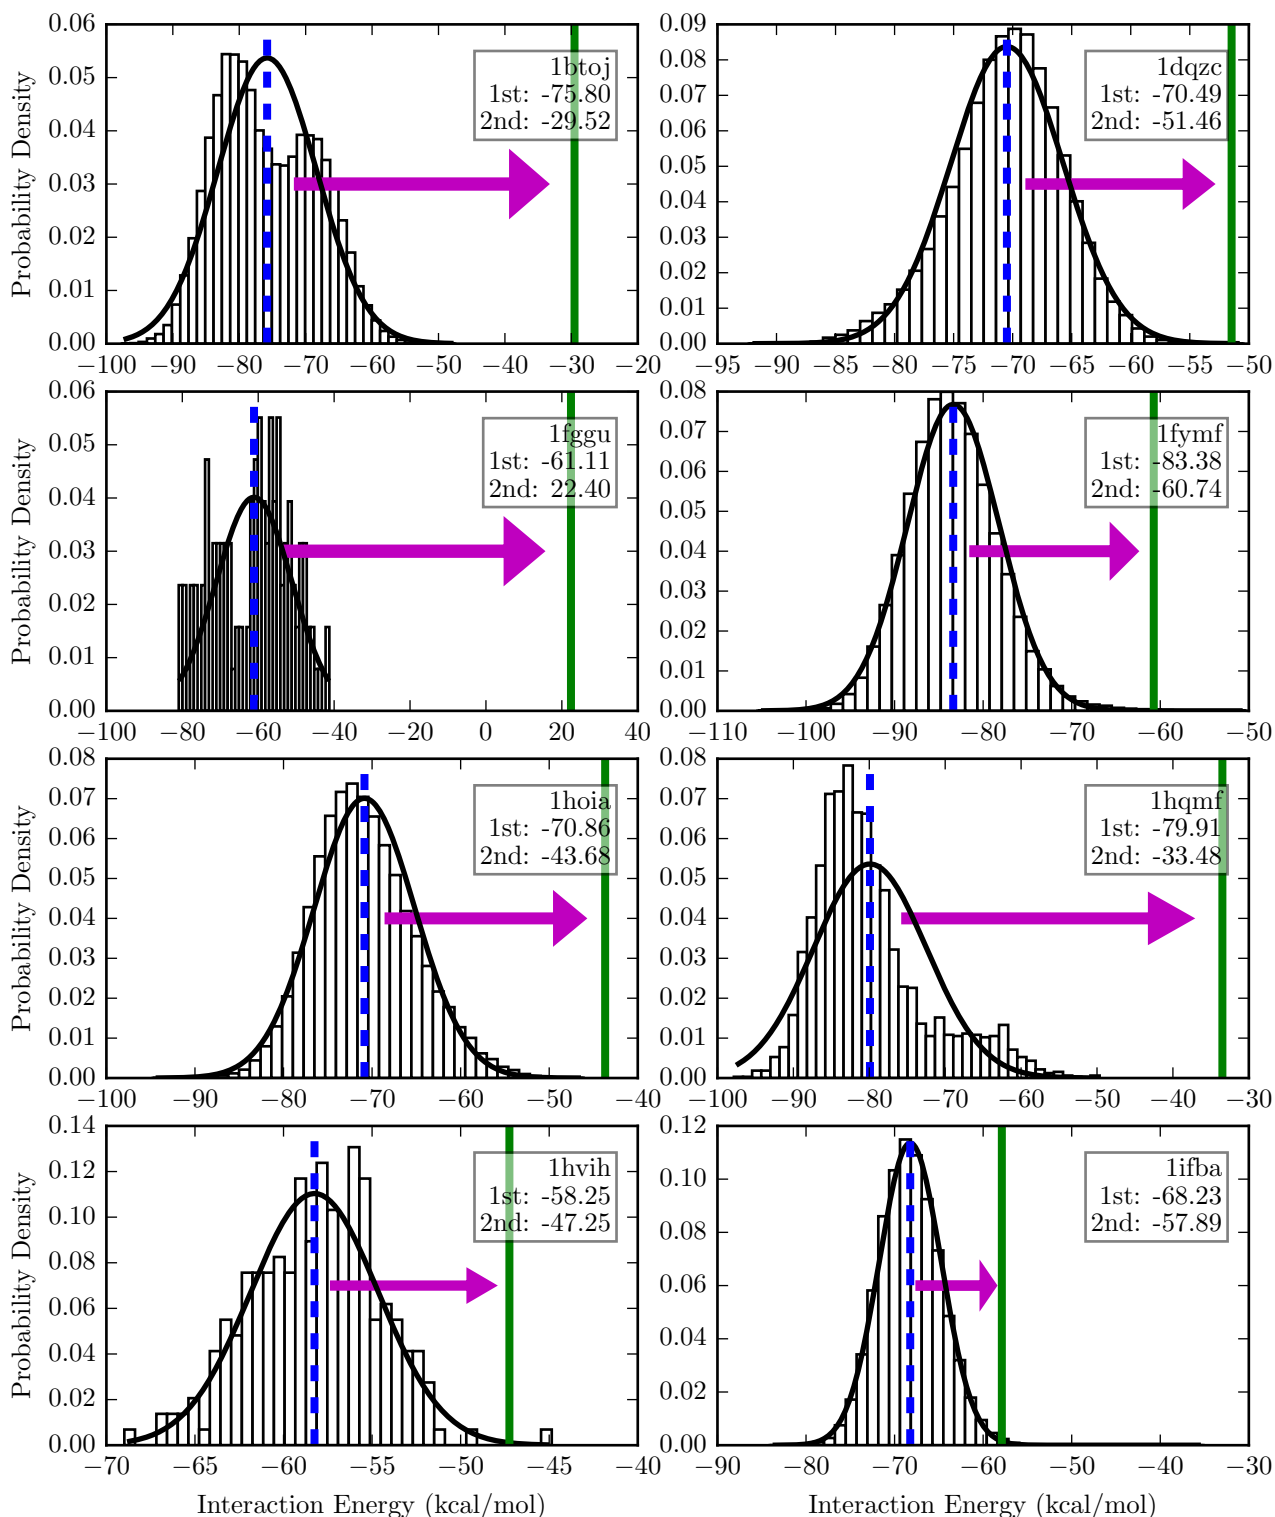

Figure S2: The bars are a normalized histogram of interaction energies observed in simulations of protein-ligand complexes (after ligand RMSD filtering): 1btoj, 1dqzc, 1fggu, 1fymf, 1hoia, 1hqmf, 1hvih, 1ifba from the FXR dataset. The mean interaction energy is shown with a dashed blue vertical line. The second-order truncation of the cumulant expansion is shown with a solid green line. A Gaussian distribution based on the sample mean and standard deviation is shown as a solid black line.

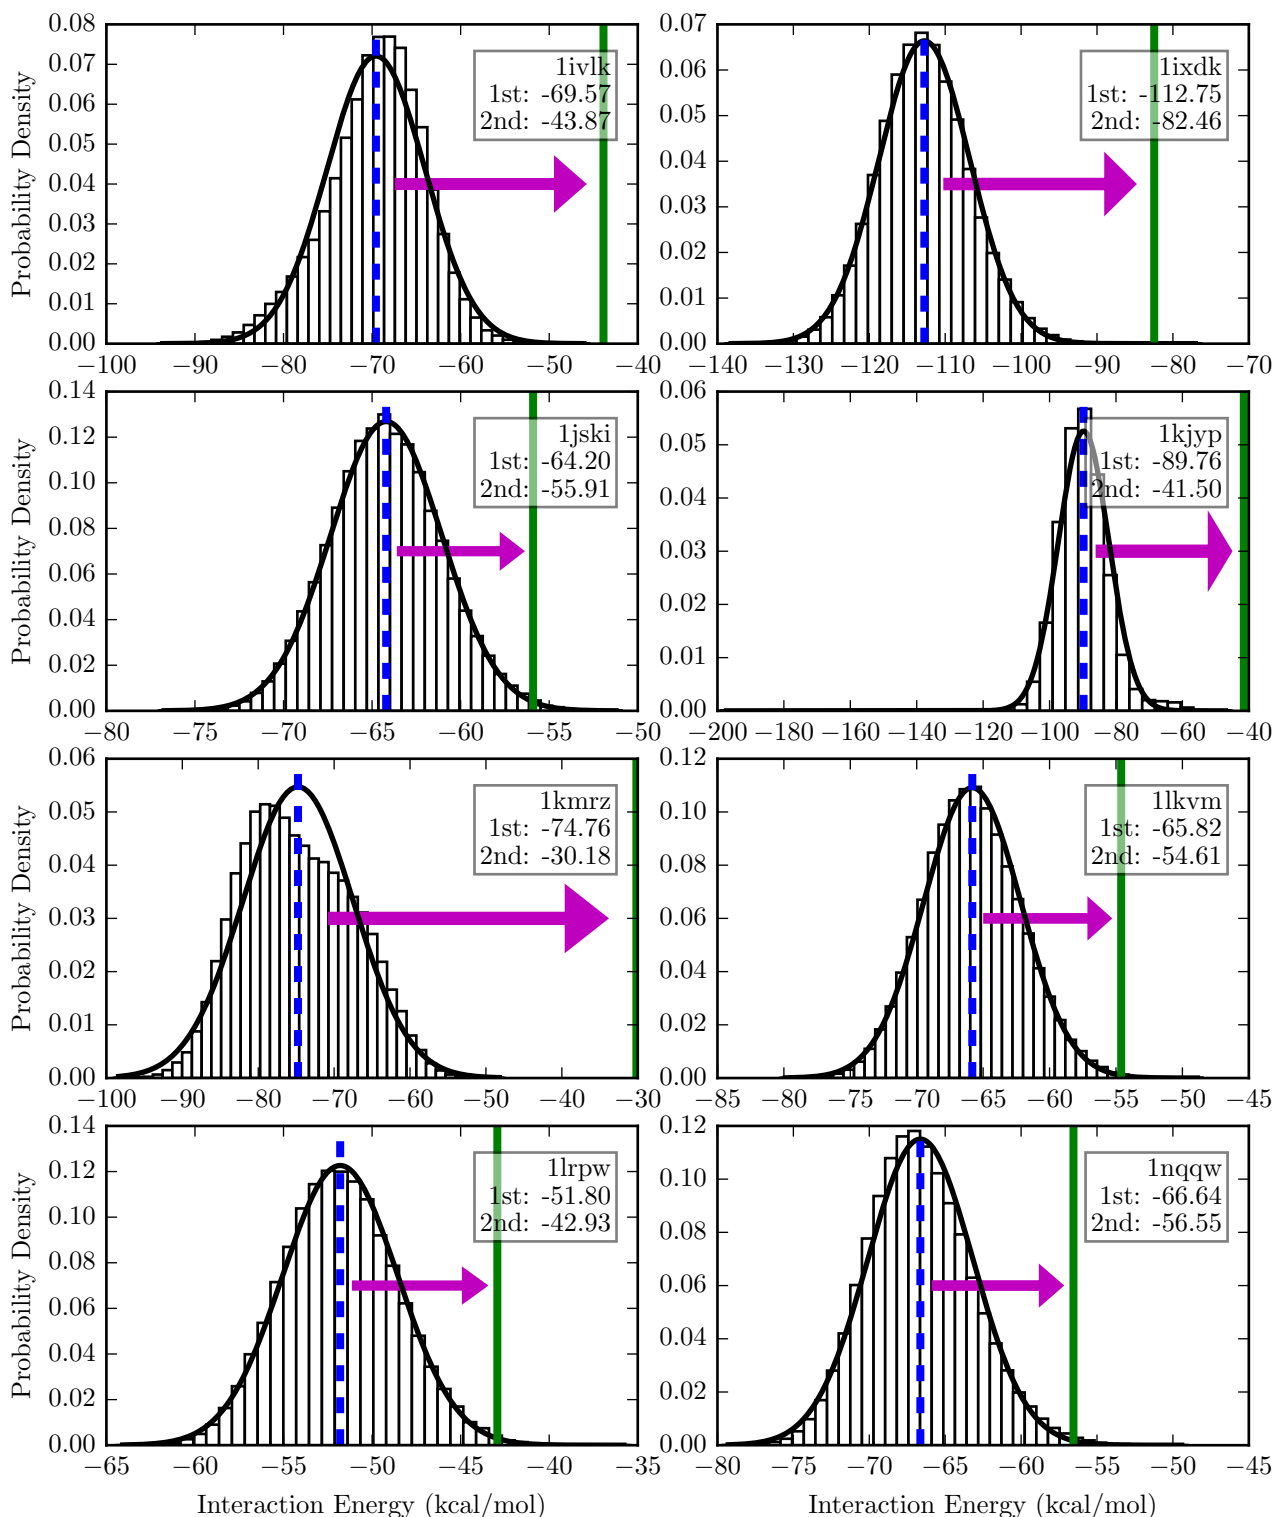

Figure S2: The bars are a normalized histogram of interaction energies observed in simulations of protein-ligand complexes (after ligand RMSD filtering): 1ivlk, 1ixdk, 1jski, 1kjyp, 1kmrz, 1lkvm, 1lrpw, 1nqqw from the FXR dataset. The mean interaction energy is shown with a dashed blue vertical line. The second-order truncation of the cumulant expansion is shown with a solid green line. A Gaussian distribution based on the sample mean and standard deviation is shown as a solid black line.

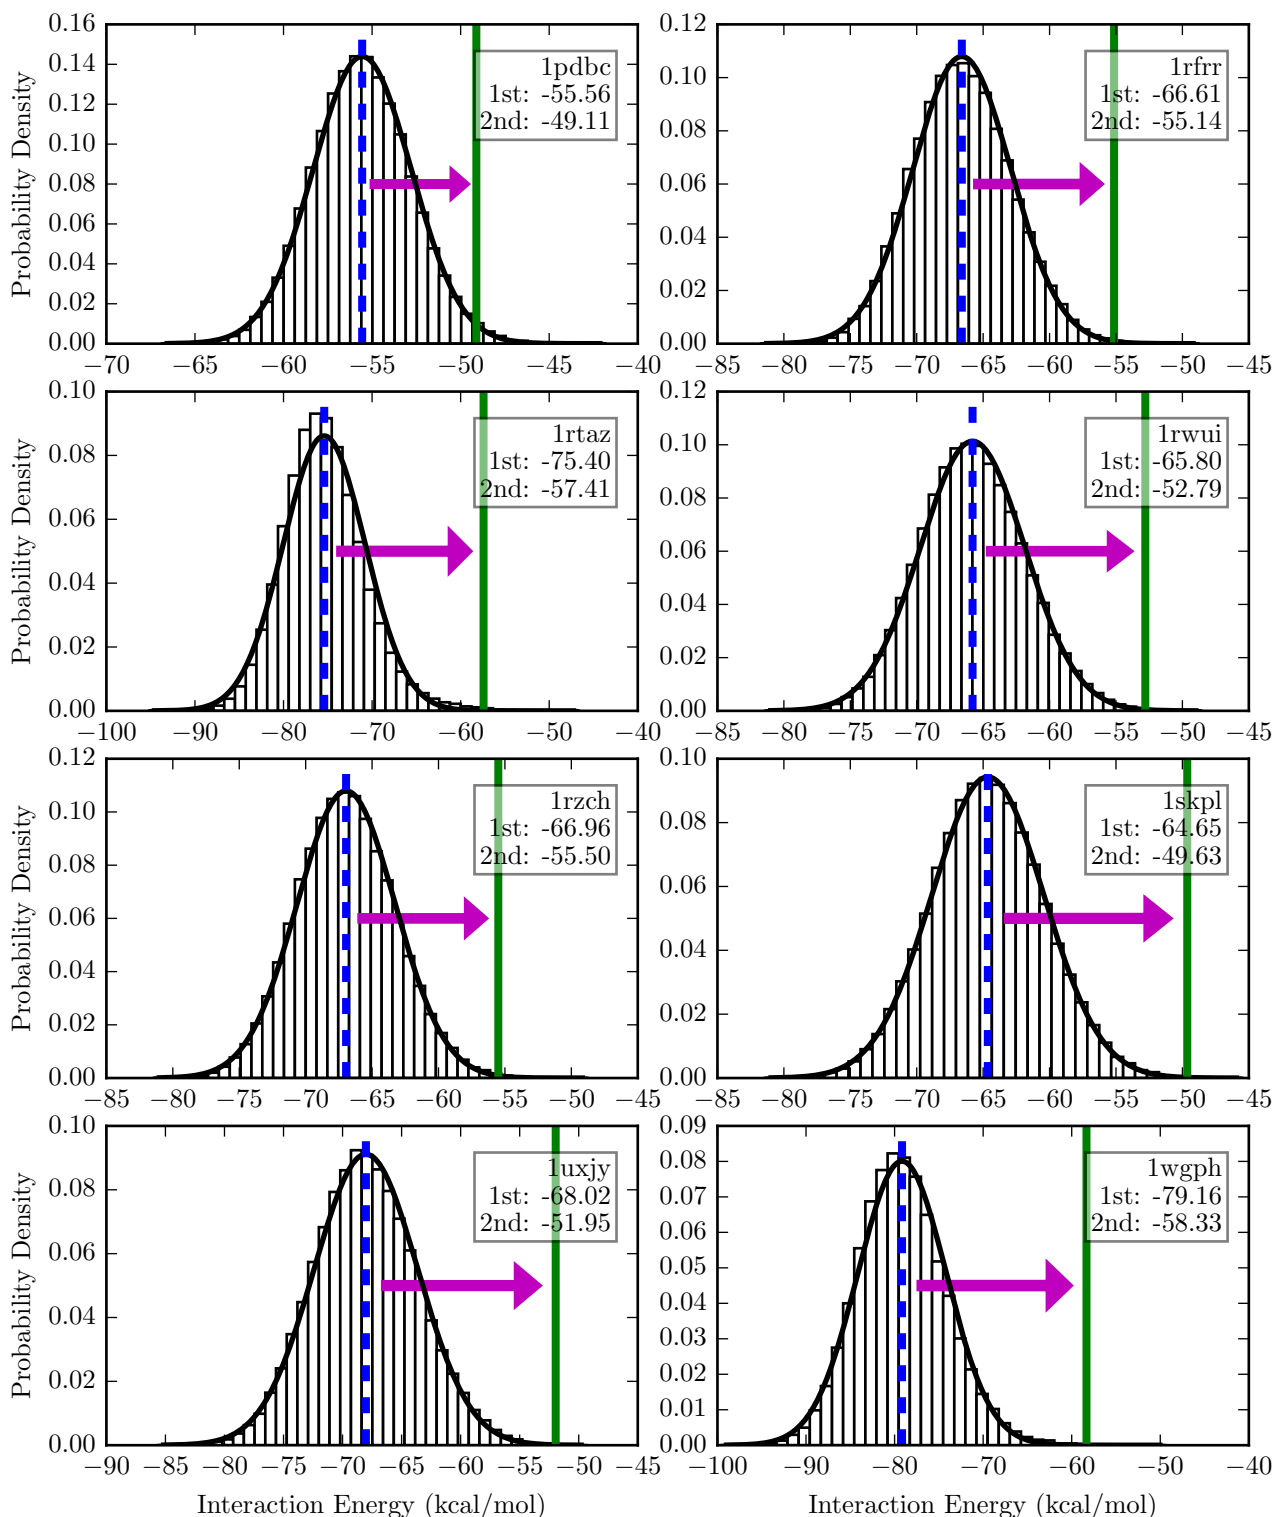

Figure S2: The bars are a normalized histogram of interaction energies observed in simulations of protein-ligand complexes (after ligand RMSD filtering): 1pdbc, 1rfrf, 1rtaz, 1rwui, 1rzch, 1skpl, 1uxjy, 1wgph from the FXR dataset. The mean interaction energy is shown with a dashed blue vertical line. The second-order truncation of the cumulant expansion is shown with a solid green line. A Gaussian distribution based on the sample mean and standard deviation is shown as a solid black line.

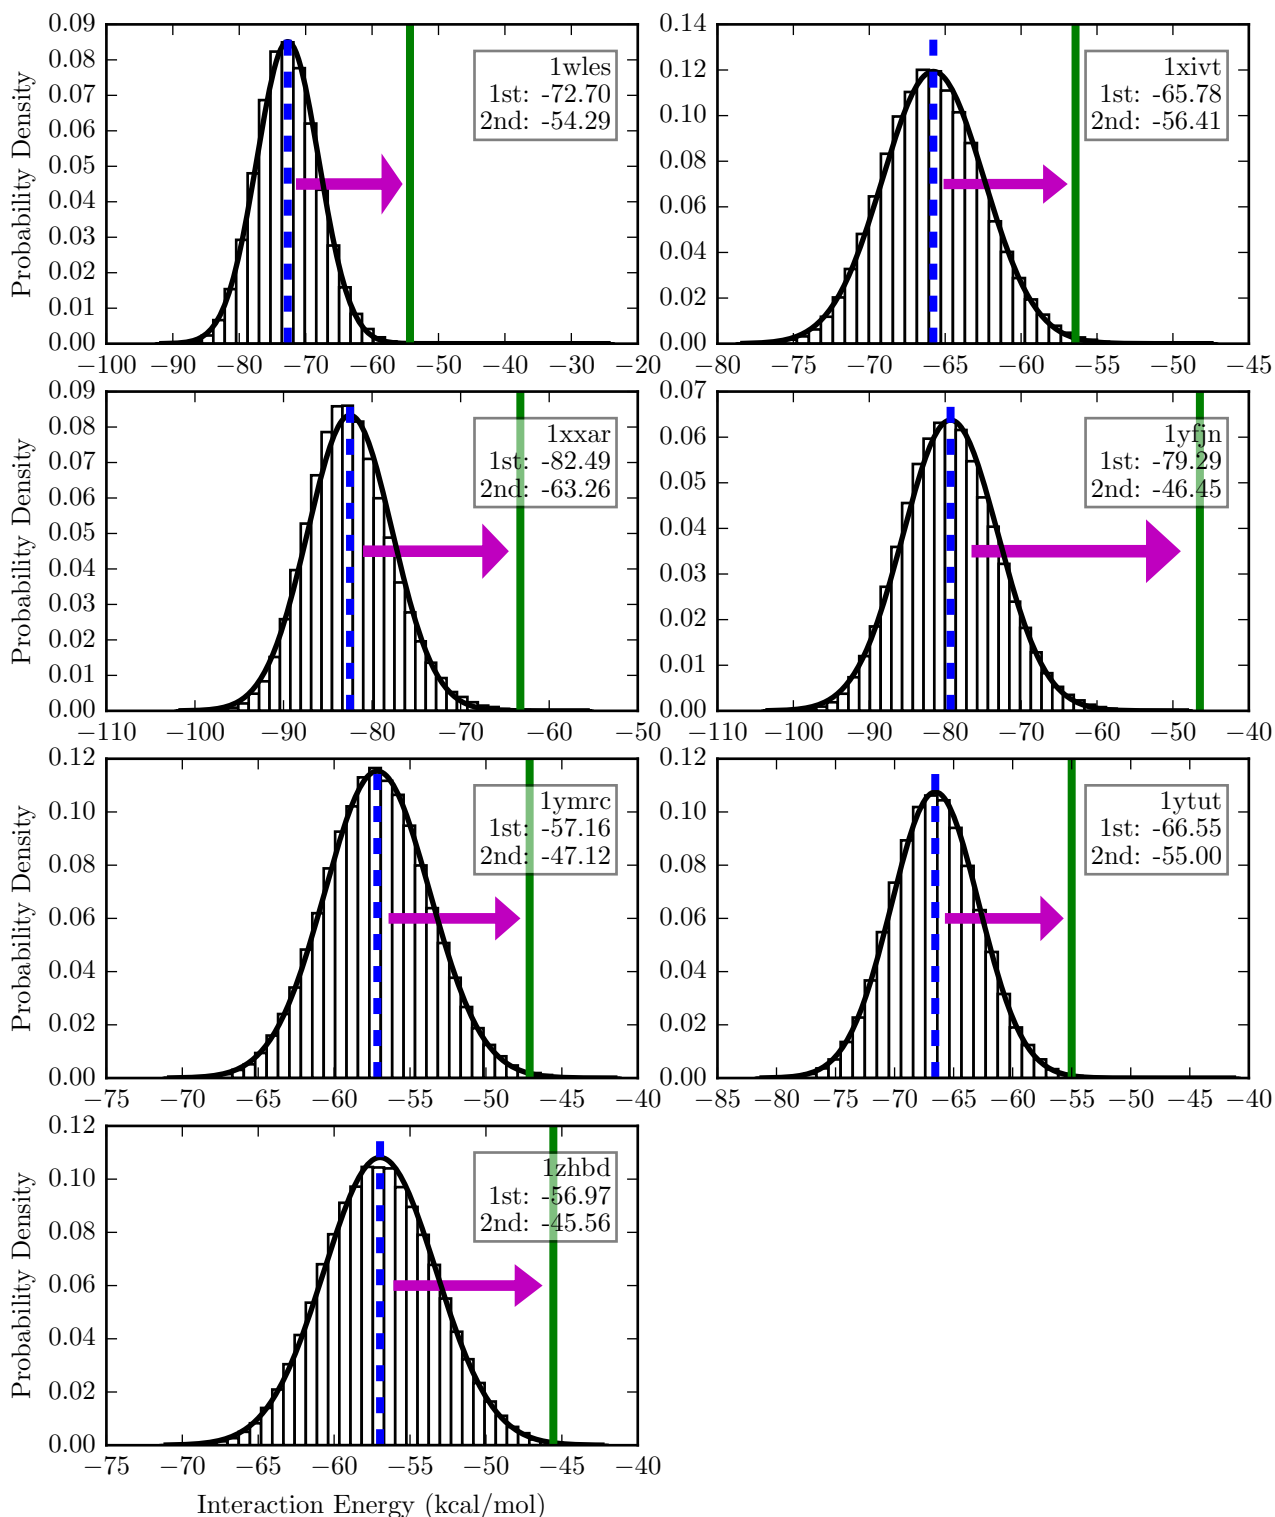

Figure S2: The bars are a normalized histogram of interaction energies observed in simulations of protein-ligand complexes (after ligand RMSD filtering): 1wles, 1xivt, 1xxar, 1yfjn, 1ymrc, 1ytut, 1zhbd from the FXR dataset. The mean interaction energy is shown with a dashed blue vertical line. The second-order truncation of the cumulant expansion is shown with a solid green line. A Gaussian distribution based on the sample mean and standard deviation is shown as a solid black line.

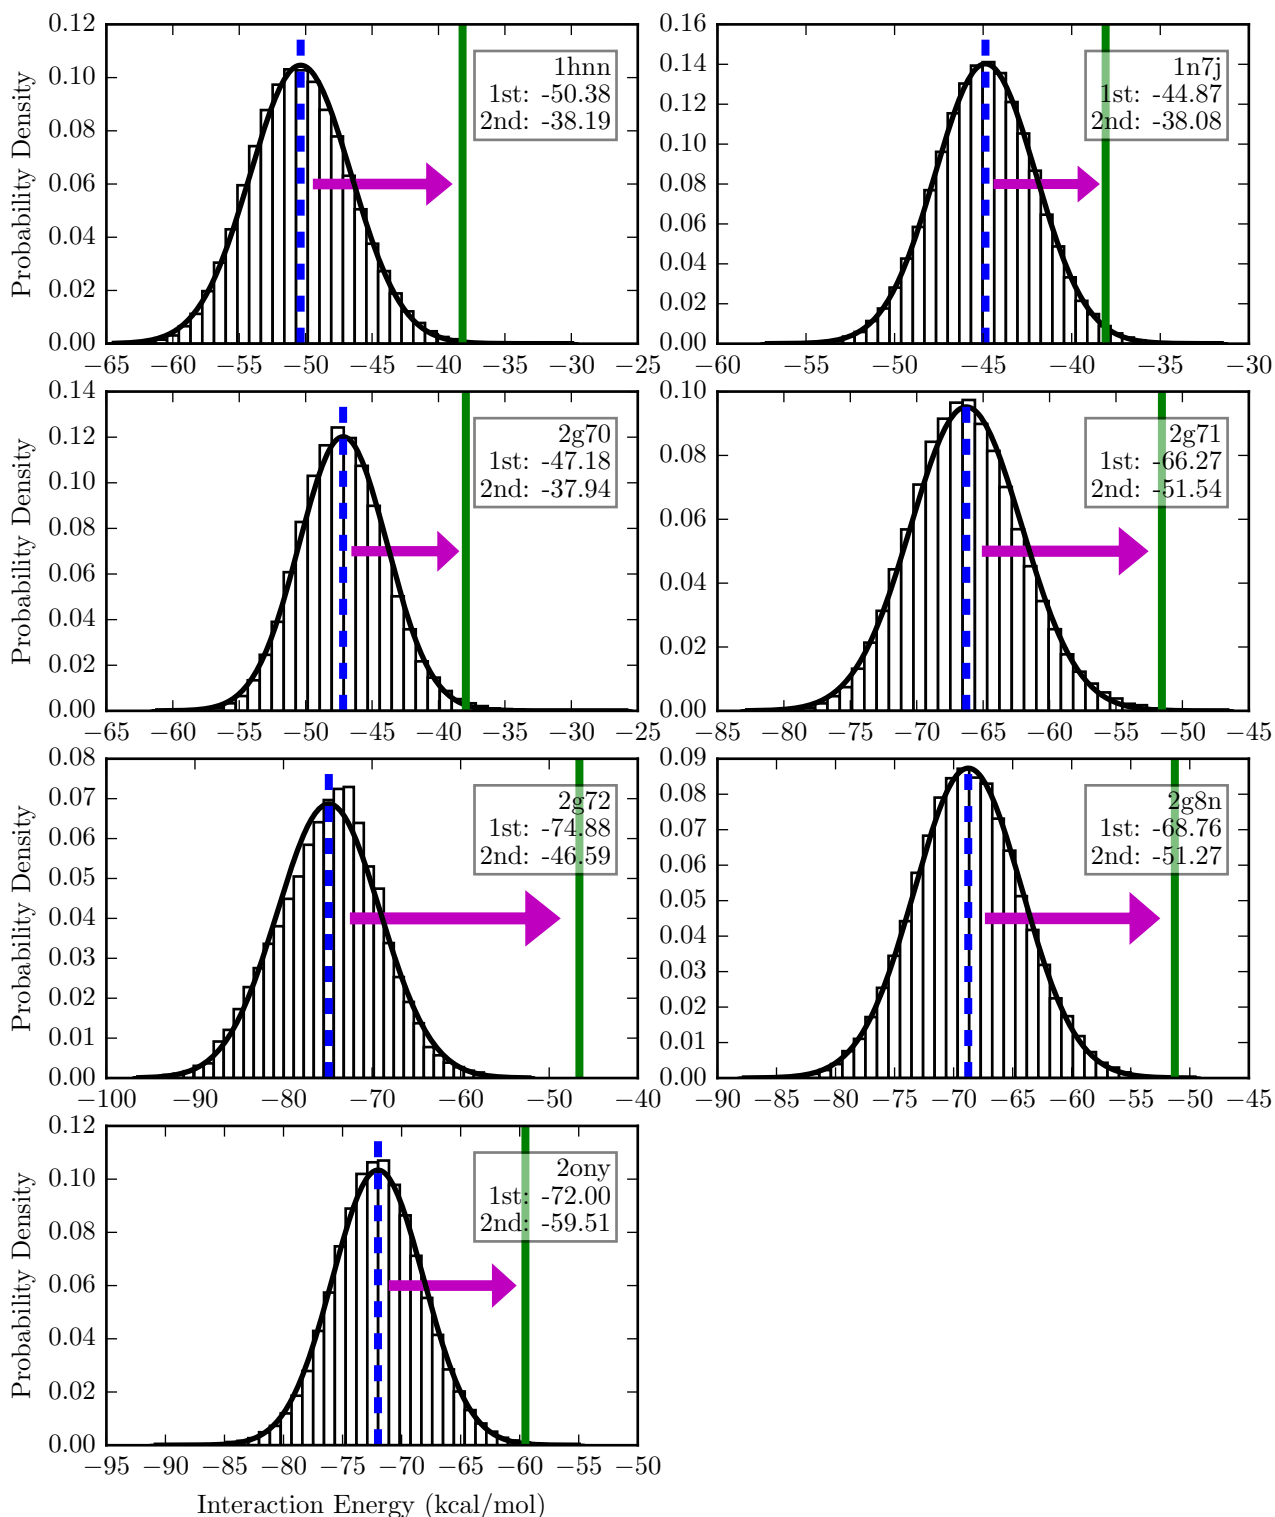

Figure S2: The bars are a normalized histogram of interaction energies observed in simulations of protein-ligand complexes (after ligand RMSD filtering): 1hnn, 1n7j, 2g70, 2g71, 2g72, 2g8n, 2ony from the hPNMT dataset. The mean interaction energy is shown with a dashed blue vertical line. The second-order truncation of the cumulant expansion is shown with a solid green line. A Gaussian distribution based on the sample mean and standard deviation is shown as a solid black line.

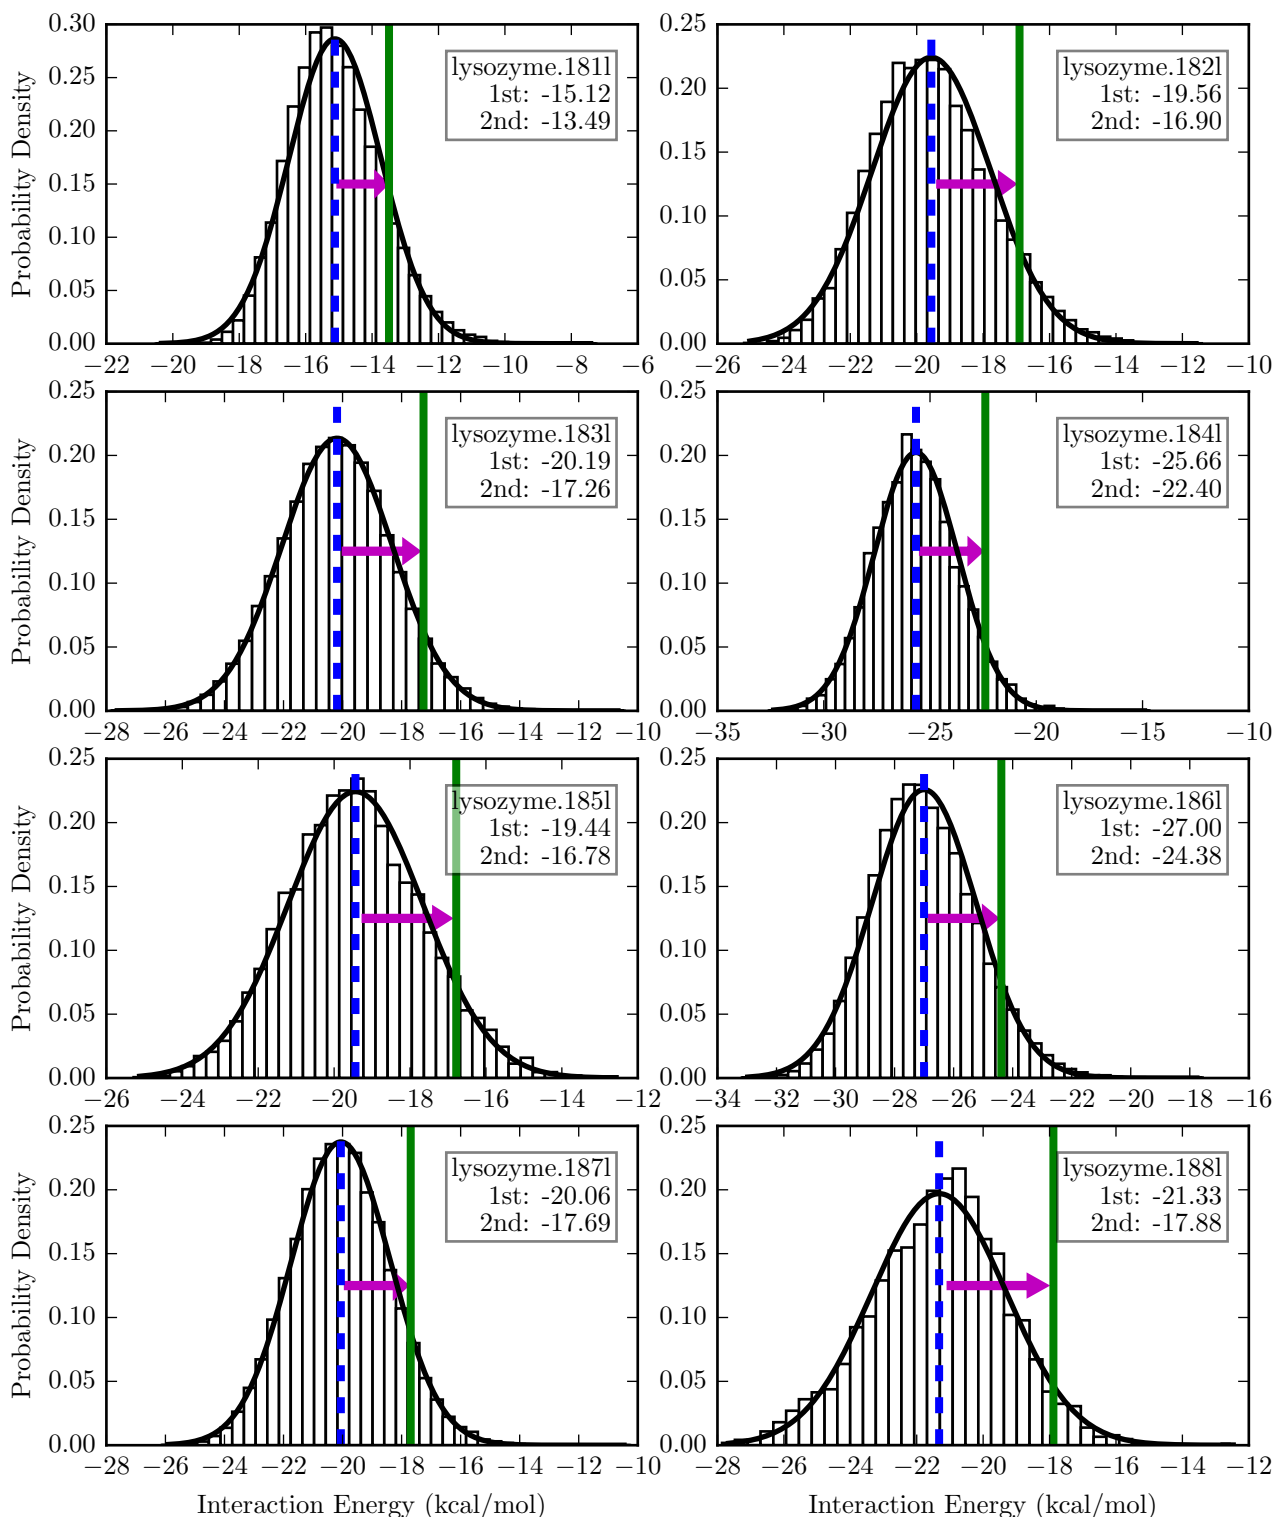

Figure S2: The bars are a normalized histogram of interaction energies observed in simulations of protein-ligand complexes (after ligand RMSD filtering): 1811, 1821, 1831, 1841, 1851, 1861, 1871, 1881 from the lysozyme dataset. The mean interaction energy is shown with a dashed blue vertical line. The second-order truncation of the cumulant expansion is shown with a solid green line. A Gaussian distribution based on the sample mean and standard deviation is shown as a solid black line.



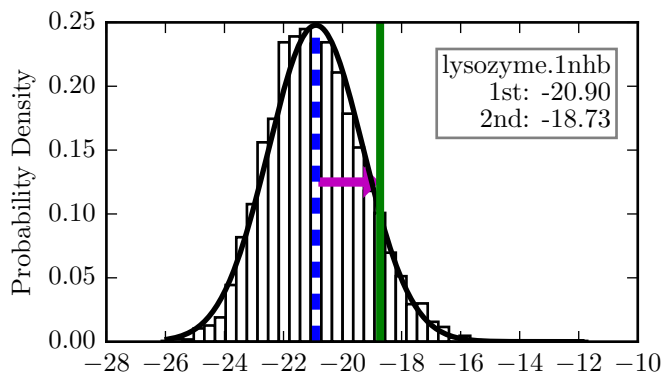

Figure S2: The bars are a normalized histogram of interaction energies observed in simulations of protein-ligand complexes (after ligand RMSD filtering): 1nhb from the lysozyme dataset. The mean interaction energy is shown with a dashed blue vertical line. The second-order truncation of the cumulant expansion is shown with a solid green line. A Gaussian distribution based on the sample mean and standard deviation is shown as a solid black line.

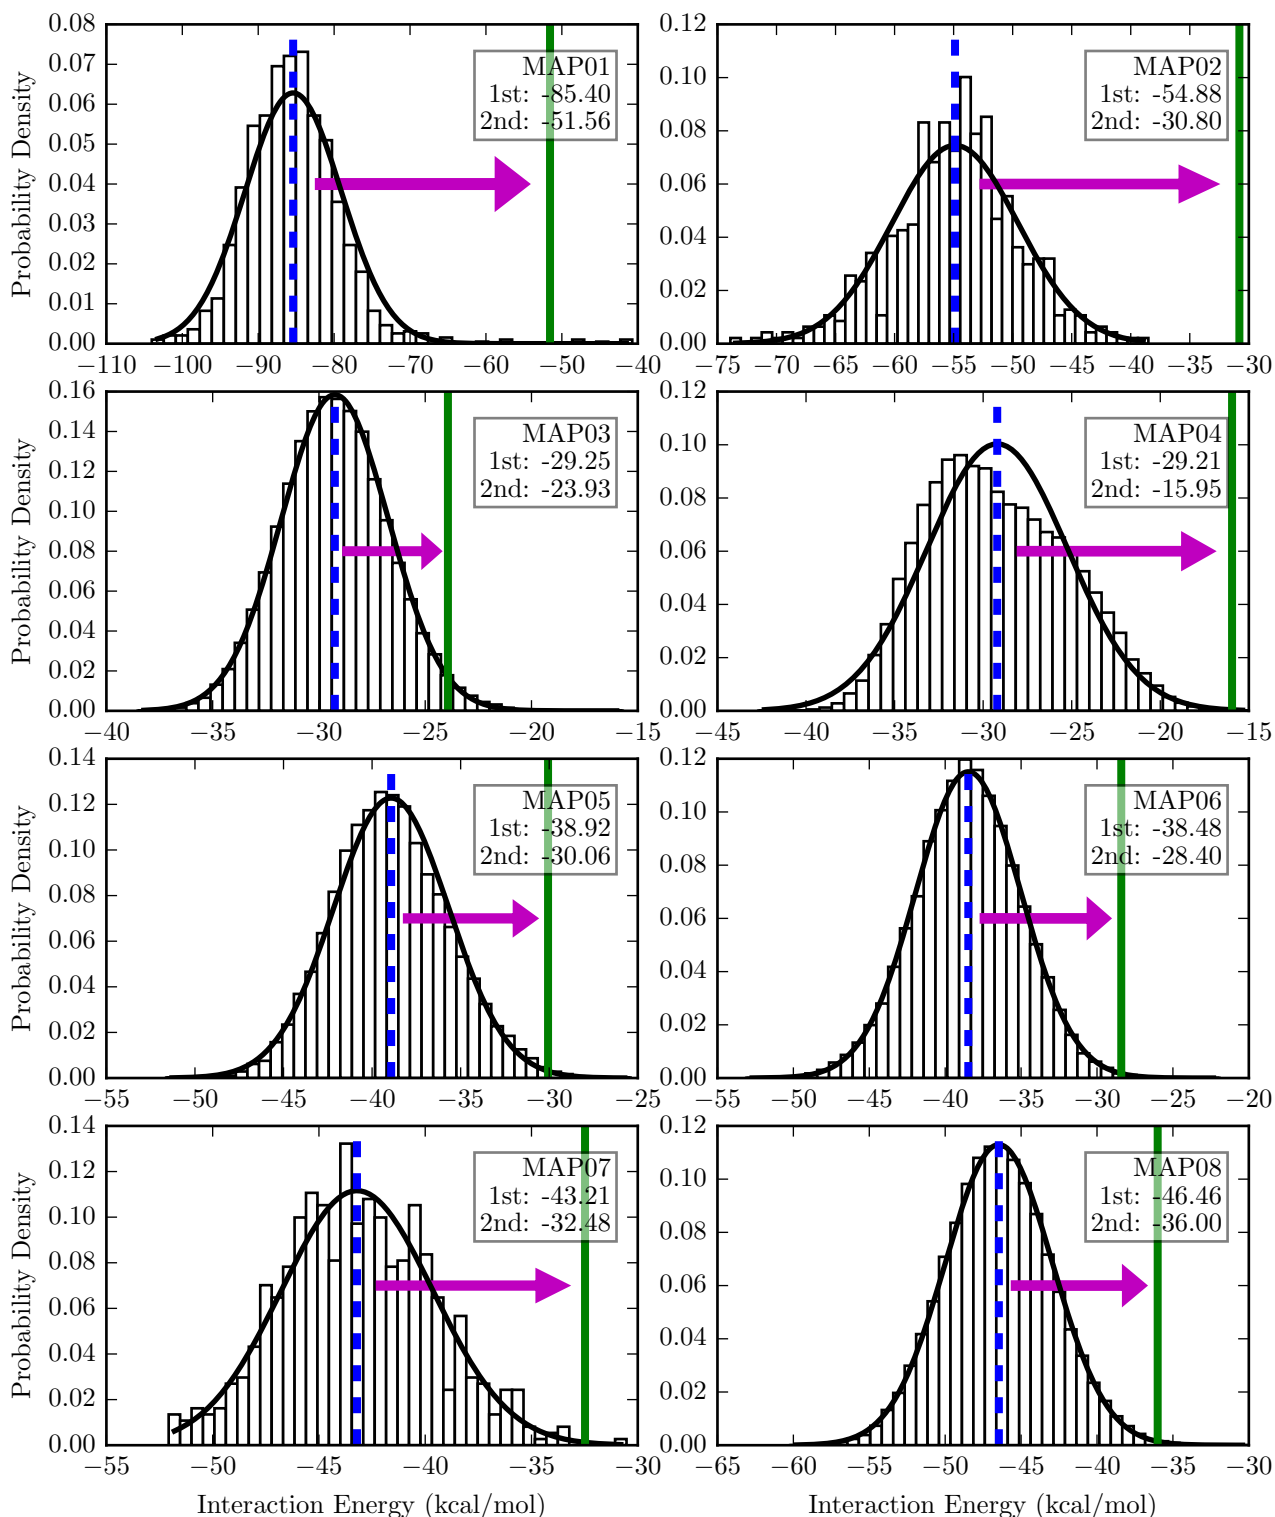

Figure S2: The bars are a normalized histogram of interaction energies observed in simulations of protein-ligand complexes (after ligand RMSD filtering): MAP01, MAP02, MAP03, MAP04, MAP05, MAP06, MAP07, MAP08 from the MAPK4K4 dataset. The mean interaction energy is shown with a dashed blue vertical line. The second-order truncation of the cumulant expansion is shown with a solid green line. A Gaussian distribution based on the sample mean and standard deviation is shown as a solid black line.

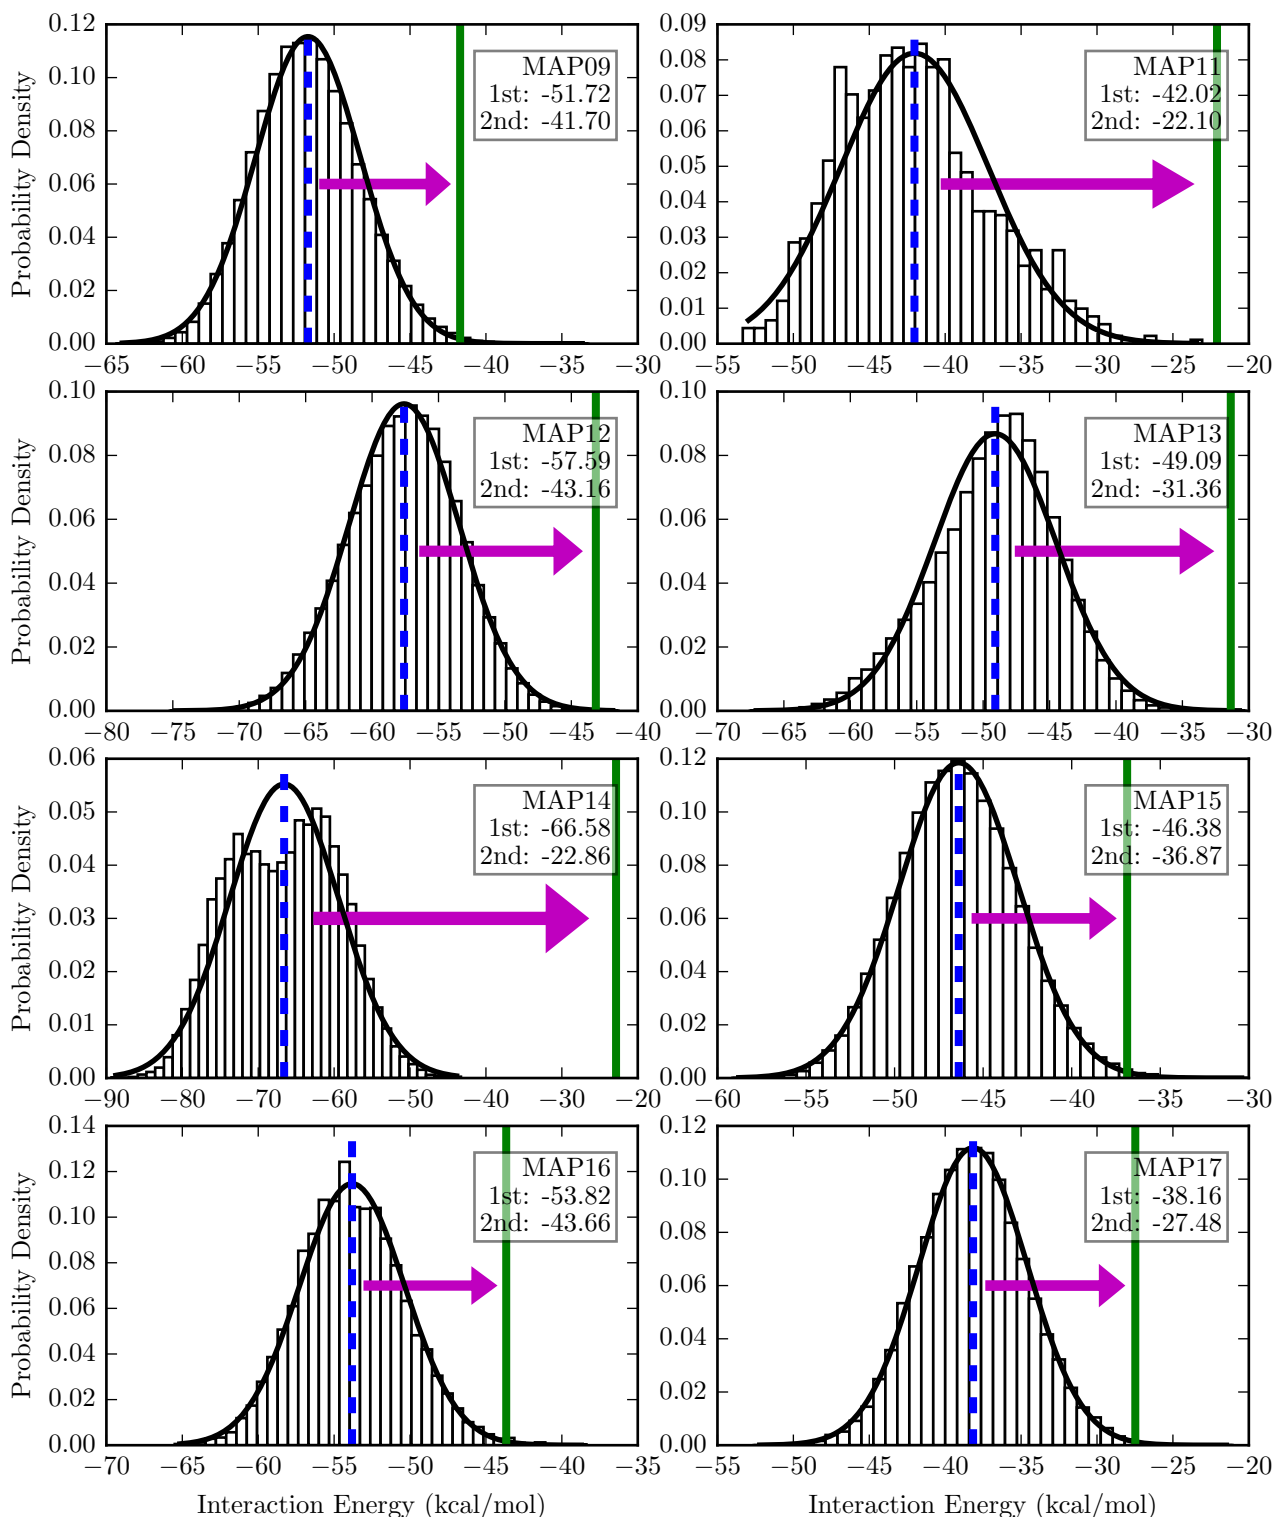

Figure S2: The bars are a normalized histogram of interaction energies observed in simulations of protein-ligand complexes (after ligand RMSD filtering): MAP09, MAP11, MAP12, MAP13, MAP14, MAP15, MAP16, MAP17 from the MAPK4K4 dataset. The mean interaction energy is shown with a dashed blue vertical line. The second-order truncation of the cumulant expansion is shown with a solid green line. A Gaussian distribution based on the sample mean and standard deviation is shown as a solid black line.

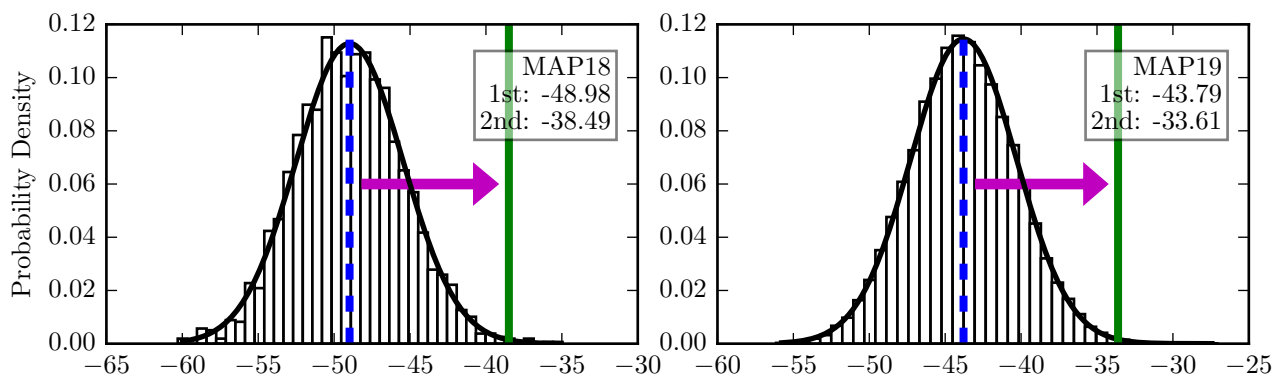

Figure S2: The bars are a normalized histogram of interaction energies observed in simulations of protein-ligand complexes (after ligand RMSD filtering): MAP18, MAP19 from the MAPK4K4 dataset. The mean interaction energy is shown with a dashed blue vertical line. The second-order truncation of the cumulant expansion is shown with a solid green line. A Gaussian distribution based on the sample mean and standard deviation is shown as a solid black line.

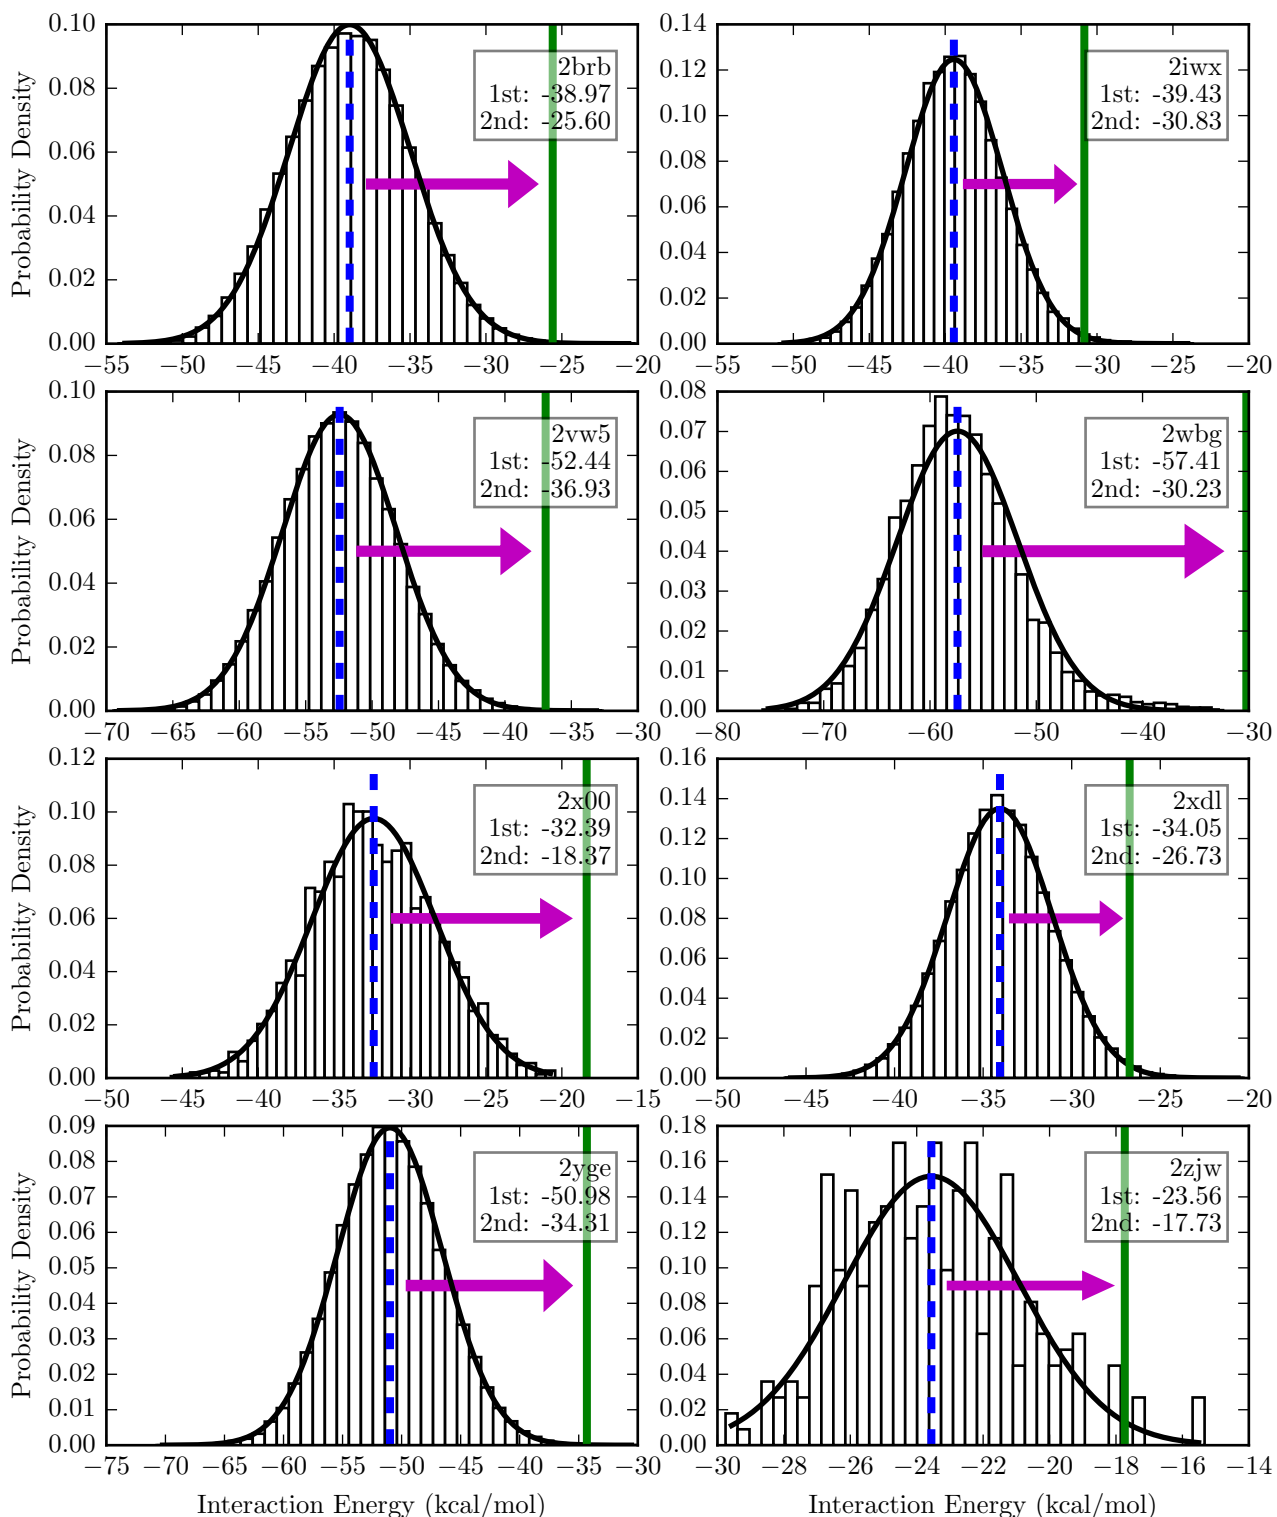

Figure S2: The bars are a normalized histogram of interaction energies observed in simulations of protein-ligand complexes (after ligand RMSD filtering): 2brb, 2iwx, 2vw5, 2wbg, 2x00, 2xdl, 2yge, 2zjw from the IE dataset. The mean interaction energy is shown with a dashed blue vertical line. The second-order truncation of the cumulant expansion is shown with a solid green line. A Gaussian distribution based on the sample mean and standard deviation is shown as a solid black line.

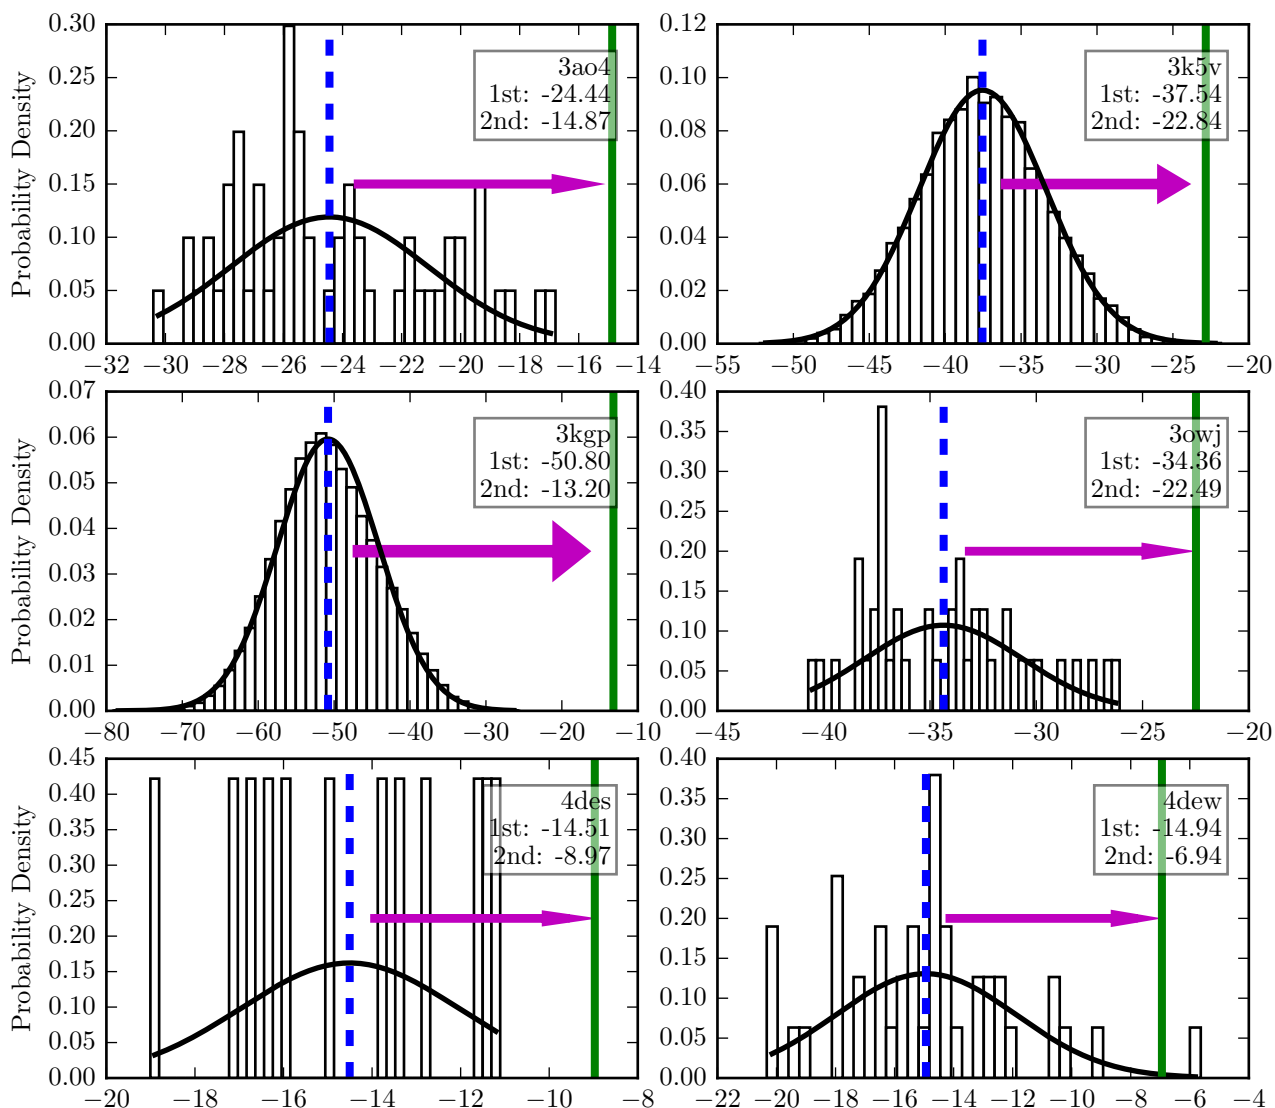

Figure S2: The bars are a normalized histogram of interaction energies observed in simulations of protein-ligand complexes (after ligand RMSD filtering): 3ao4, 3k5v, 3kgp, 3owj, 4des, 4dew from the IE dataset. The mean interaction energy is shown with a dashed blue vertical line. The second-order truncation of the cumulant expansion is shown with a solid green line. A Gaussian distribution based on the sample mean and standard deviation is shown as a solid black line.

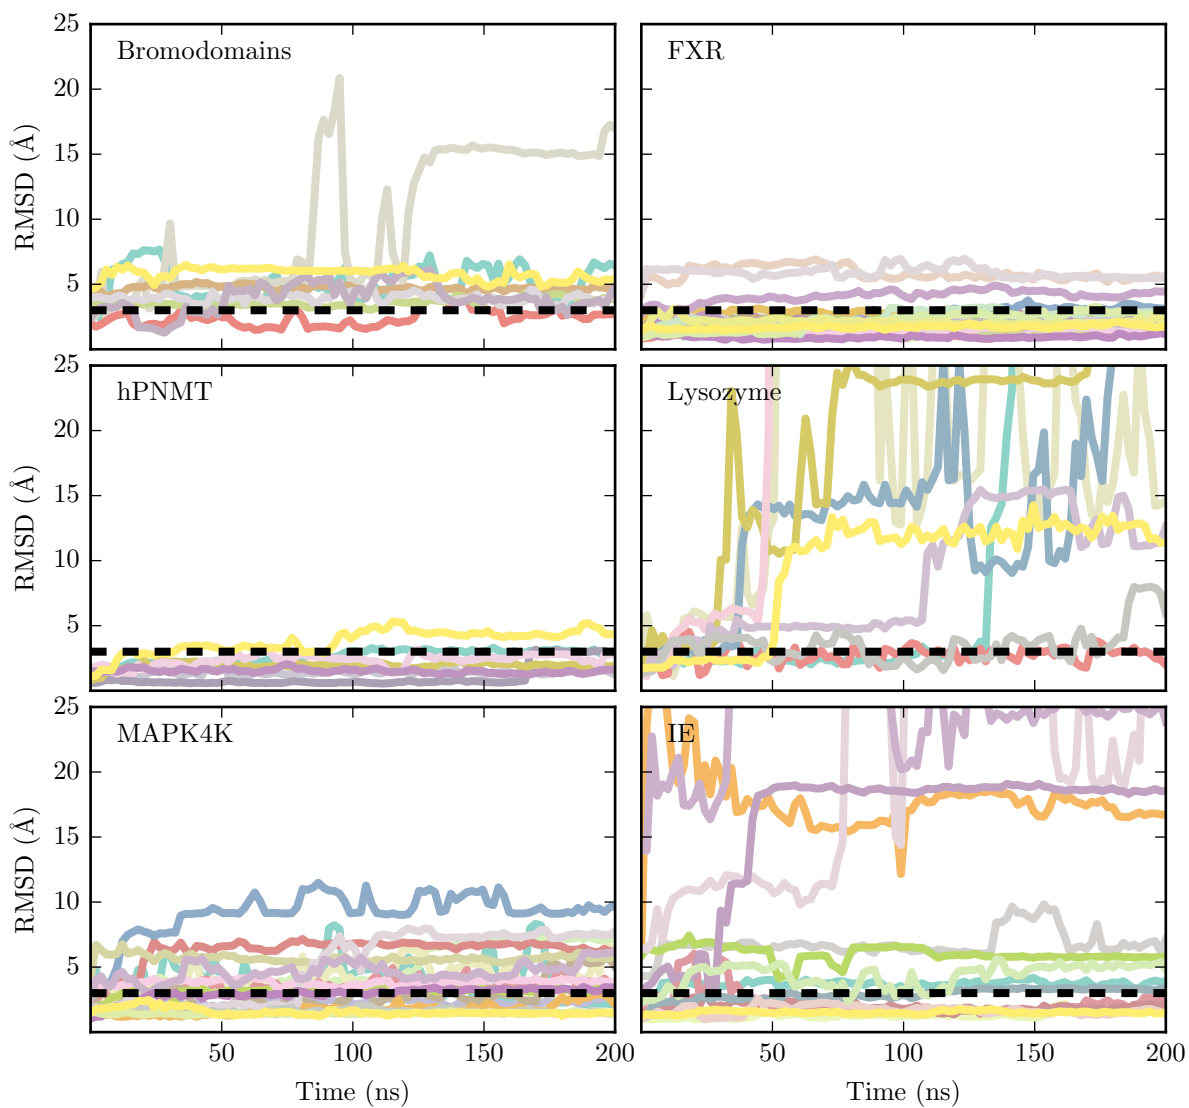

Figure S3: **Ligand RMSD as a function of time.** The running average of the ligand RMSD compared to the crystal structure over 2 ns intervals is shown. The y axis is restricted to between 0 and 25 Å. The dashed line is at 3 Å, which we used as the native pose cutoff.

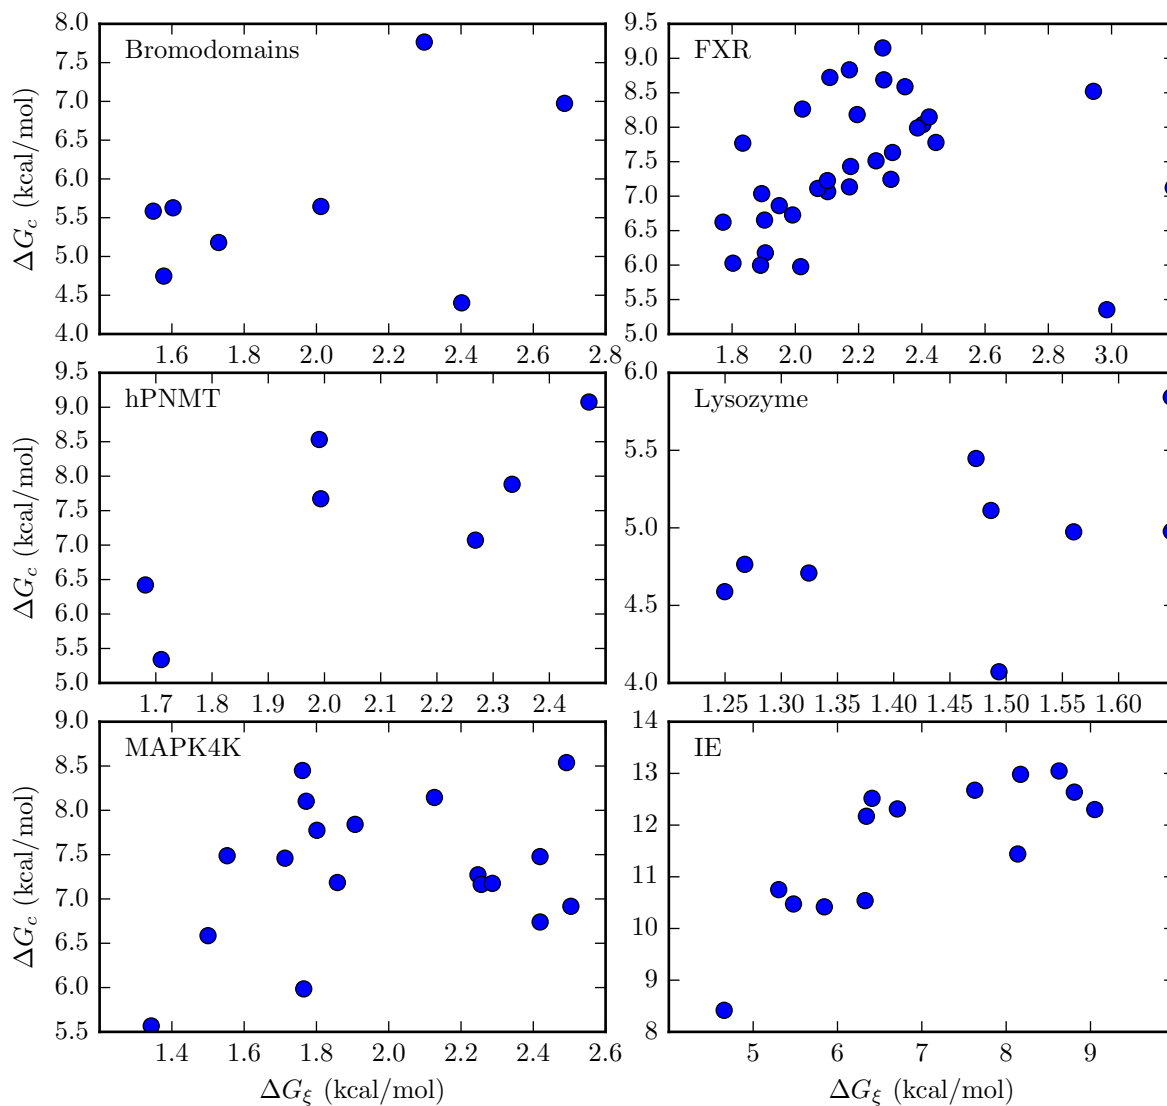

Figure S4: **Free energy corrections based on ligand external entropy:** restricting the ligand to the binding site ( $\Delta G_\xi$ ) and of imposing a confining potential on translational and rotational degrees of freedom ( $\Delta G_c$ ). The latter is based on  $\Delta G_c = \Delta G_{c,L} - \Delta G_{c,RL}$  and does not include importance sampling effects through  $\Delta G_{RL}^c$ .



```

#!/usr/bin/env python

import os, sys, glob, pickle, gzip
import numpy as np
from numpy import arange, dtype
import scipy.stats
from scipy.stats import spearmanr, kendalltau, gaussian_kde
import math
import itertools
import pymbar

BETA = 1./(8.3144621E-3/4.184*300) # mol/kcal
rmsd_filters = [3.0, np.inf]

if not 'system_dir' in locals().keys():
    system_dir = '/home/cli78/MM_PBSA/bromodomains/'

#####
# Parse input arguments #
#####

import argparse
parser = argparse.ArgumentParser()
parser.add_argument('--reference_data', \
    default=system_dir + 'experimental.dat', \
    help='File with reference free energies')

parser.add_argument('--sampler_dir', \
    default=system_dir, \
    help='Directory with sampler energies')
parser.add_argument('--sampler_total_E_FN', \
    default='trajectory.log', \
    help='File name for sampler complex energies')

parser.add_argument('--nm_dir', \
    default=system_dir, \
    help='Directory with normal modes analysis')
parser.add_argument('--nm_RL_FN', \
    default='complex_nm.out', \
    help='File name for normal modes of the complex')
parser.add_argument('--nm_R_FN', \
    default='receptor_nm.out', \
    help='File name for normal modes of the receptor')
parser.add_argument('--nm_L_FN', \
    default='ligand_nm.out', \

```

```

    help='File name for normal modes of the ligand')

parser.add_argument('--GBSA_dir', \
    default=system_dir, \
    help='Directory with GBSA energies')
parser.add_argument('--GBSA_RL_FN', \
    default='trajectory.log', \
    help='File name for GBSA complex energies')
parser.add_argument('--GBSA_R_FN', \
    default='protein.dat', \
    help='File name for GBSA receptor energies')
parser.add_argument('--GBSA_L_FN', \
    default='ligand.dat', \
    help='File name for GBSA ligand energies')

parser.add_argument('--ligand_dir', \
    default=system_dir, \
    help='Directory with ligand RMSDs, prmtop, and dcd files')
parser.add_argument('--ligand_RMSD_FN', \
    default='ligand_rmsd.dat', help='File name for ligand rmsds')
parser.add_argument('--ligand_prmtop_FN', \
    default='vacuum.prmtop', help='File name for ligand prmtop')
parser.add_argument('--ligand_dcd_FN', \
    default='ligand_aligned.dcd', \
    help='Trajectory of the ligand from the simulation of the complex')

parser.add_argument('--skip_analysis', \
    action='store_true', \
    help='Does not do analysis')
parser.add_argument('-f', help='Dummy argument for ipython')

args = parser.parse_args()
del argparse

#####
# Read reference data #
#####

F = open(args.reference_data)
dat = F.readlines()
F.close()

ref_dG = {}
for line in dat:
    (id, dG) = line.split()

```

```

    ref_dG[id] = float(dG)
ids = ref_dG.keys()
del dat, F

#####
# Load data #
#####

def load_potential_energy(FN):
    """
    Loads a file with potential energies, returning them in kcal/mol
    """
    if os.path.isfile(FN):
        F = open(FN, 'r')
        dat = F.read().strip()
        F.close()
        if FN.endswith('.log'):
            lines = dat.split('\n')
            return np.array([float(line.split('\t')[3]) for line in lines[1:]])/4.184
        elif FN.endswith('.dat'):
            lines = dat.split('\n')
            return np.array([float(line) for line in lines])/4.184
        elif FN.endswith('.0'):
            frames = dat.split('Processing frame')[1:]
            energies = np.array(\
                [f.replace('1-4 ', '1-4_')[f.find('BOND'):].split()[2:35:3] \
                 for f in frames], dtype=float)
            # return np.sum(energies,1)/4.184
            return np.sum(energies[:, [3,4,5,9,10]],1)/4.184
        elif FN.endswith('.out'):
            # The normal modes output is in cal/mol/K
            # The conversion is to kcal/mol at 298.15 K
            if dat=='':
                print 'Empty file '+FN
                return np.array(np.nan)
            entropies = np.array([d.split()[-1] for d in dat.split('\n')], \
                dtype=float)*298.15/1000.
            return entropies
            pass
        else:
            raise Exception('Extension not recognized')
    else:
        print 'Missing file '+FN
        return np.array(np.nan)

```

```

def load_RMSD(FN, nvals):
    """
    Loads a file with ligand RMSDs, in Angstroms
    """
    if os.path.isfile(FN):
        F = open(FN, 'r')
        dat = F.read().strip()
        F.close()
        return np.array([np.float(d.split()[1]) for d in dat.split('\n')[1:]])
    else:
        print 'Missing file ' + FN
        return np.zeros(nvals)

def get_external_dof(traj):
    """
    Calculate external degrees of freedom:
    (1) the center of mass and
    (2) the euler angle based on the principle axes of rotation
    """
    import mdtraj
    com = mdtraj.compute_center_of_mass(traj)
    inertial_tensors = mdtraj.geometry.compute_inertia_tensor(traj)

    euler_angles = []
    # Principal axes are eigenvectors of the interial tensors
    # This makes the first principal axis Z, second Y, and third X
    for inertial_tensor in inertial_tensors:
        [w,v] = np.linalg.eig(inertial_tensor)
        (X,Y,Z) = [v[:,i] for i in np.argsort(w)]
        # Euler angles are determined from principal axes
        # https://en.wikipedia.org/wiki/Euler_angles
        euler_angles.append([np.arctan2(Z[0],Z[1]), \
                             np.arccos(Z[2]), \
                             np.arctan2(X[2],Y[2])])
    euler_angles = np.array(euler_angles)
    return (com, euler_angles)

Es = dict([(id,{}) for id in ids])

for id in ids:
    Es[id]['sampler'] = load_potential_energy(\
        os.path.join(args.sampler_dir,id,args.sampler_total_E_FN))
    for solvent in ['GBSA','nm']:
        dir = os.path.join(getattr(args,solvent+'_dir'),id)
        for moeity in ['L','R','RL']:

```

```

        Es[id]['s_%s'%(solvent,moeity)] = load_potential_energy(\
            os.path.join(dir, getattr(args, 's_%s_FN'%(solvent,moeity))))
Es[id]['RMSD'] = load_RMSD(\
    os.path.join(args.ligand_dir,id,args.ligand_RMSD_FN), \
    len(Es[id]['sampler']))
if np.any([np.any(np.isnan(Es[id][key])) for key in Es[id].keys()]):
    print 'Removing '+id
    del Es[id]
    ids = [item for item in ids if not item==id]

import mdtraj
from netCDF4 import Dataset
import sys
sys.stdout.write('Getting external degrees of freedom for')

if not os.path.isdir('external_dof'):
    os.mkdir('external_dof')
for id in ids:
    sys.stdout.write(' ' + id)

    loaded = False
    FN = os.path.join('external_dof',id + '.nc')
    if os.path.isfile(FN):
        try:
            nc = Dataset(FN,'r')
            Es[id]['com'] = nc.variables['com'][:]
            Es[id]['euler_angles'] = nc.variables['euler_angles'][:]
            nc.close()
            loaded = True
        except:
            loaded = False
    if not loaded:
        traj_FN = os.path.join(args.ligand_dir,id,args.ligand_dcd_FN)
        if not os.path.isfile(traj_FN):
            print 'Ligand trajectory missing in '+traj_FN
            (Es[id]['com'], Es[id]['euler_angles']) = (np.zeros(3), np.zeros(3))
            continue
        prmtop_FN = os.path.join(args.ligand_dir,id,args.ligand_prmtop_FN)
        traj = mdtraj.load(traj_FN, top=prmtop_FN)
        (Es[id]['com'], Es[id]['euler_angles']) = get_external_dof(traj)
        nc = Dataset(FN,'w',format='NETCDF4')
        nc.createDimension('n_frames', Es[id]['com'].shape[0])
        nc.createDimension('n_coords', 3)
        nc.createVariable('com','f8',('n_frames','n_coords'))
        nc.createVariable('euler_angles','f8',('n_frames','n_coords'))

```

```

nc.variables['com'][:] = Es[id]['com']
nc.variables['euler_angles'][:] = Es[id]['euler_angles']
nc.close()
sys.stdout.write('\n\n')

print 'Number of energies:'
print '\tSampler\t|\tGBSA\t|\t\t|\tnm\t|\t\t|\tCOM\t|\tRMSD'
for id in ids:
    count_str = id + '\t%d'%(len(Es[id]['sampler'])) + '\t|\t'
    count_str += '\t|\t'.join(['\t'.join([\
        'nan' if np.isnan(Es[id]['%s_%s'%(solvent,moeity)]).any() \
        else '%d'%len(Es[id]['%s_%s'%(solvent,moeity)]) \
        for moeity in ['L','R','RL']) for solvent in ['GBSA','nm']])
    count_str += '\t|\t' + '%d'%len(Es[id]['com'])
    count_str += '\t|\t' + '%d'%len(Es[id]['RMSD'])
    print count_str
print

#####
# Binding free energy estimates #
#####

def estimate_dG(Psi, nm_TdS, DeltaU=None):
    """
    Returns an array of free energy estimates:
    based on cumulants 1-4, EXP, and then NM.
    Psi are interaction energies.
    nm_TdS are entropy terms from normal modes analysis.
    DeltaU are reweighting factors for individual configurations.
    """
    if DeltaU is None:
        cumulants = [np.nan] + [scipy.stats.kstat(Psi,n) for n in range(1,5)]
        dG = np.cumsum([BETA**(n-1)*cumulants[n]/math.factorial(n) \
            for n in range(1,5)])
        exp = (np.log(np.mean(np.exp(BETA*Psi-max(BETA*Psi))))+max(BETA*Psi))/BETA
    else:
        num = Psi - DeltaU
        den = -DeltaU
        cumulants_num = [np.nan] + [scipy.stats.kstat(num,n) for n in range(1,5)]
        cumulants_den = [np.nan] + [scipy.stats.kstat(den,n) for n in range(1,5)]
        dG = np.cumsum([BETA**(n-1)*(cumulants_num[n] - cumulants_den[n])/
            math.factorial(n) for n in range(1,5)])
        exp = (np.log(np.average(np.exp(BETA*num-max(BETA*num)))) + max(BETA*num) \
            - np.log(np.average(np.exp(BETA*den-max(BETA*den)))) - max(BETA*den))/BETA
    return np.array(list(dG) + [exp, dG[0] - nm_TdS])

```

```

def calc_confinement_fe(com, euler, nbins=100):
    """
    Obtains the free energy of
    (1) putting the unbound ligand into the binding site, dG_xi
    (2) adding constraints to the unbound ligand and
        removing them from the bound complex, dG_c
    """
    # Scott's rule for Gaussian kernel density estimate bandwidth
    npts = com.shape[0]
    scotts_factor = np.power(npts, (-1./5))

    dG_xi = []
    dG_c = []
    U_c = []

    # Translational degrees of freedom

    # The standard state volume for a single molecule
    # in a box of size 1 L is 1.66053928 nanometers**3
    L_o = 1.66053928**(1/3.)

    def calc_translational(x):
        tail = (max(x)-min(x))*0.1
        edges = np.linspace(min(x)-tail, max(x)+tail, nbins)
        delta = (edges[1]-edges[0])
        centers = edges + delta/2.

        # Obtain confinement potential
        kernel = gaussian_kde(x)
        rho = kernel(centers)
        U = -np.log(rho)/BETA

        # Obtain confinement energies for bound state
        inds = np.array(np.floor(\
            (x-edges[0])/delta), dtype=np.int)
        inds[inds==nbins] = nbins-1
        DeltaU = U[inds]

        # Estimate confinement free energies
        # For dG_cL, use numerical integral for expectation
        dG_cL = -1/BETA*np.log(np.mean(np.exp(-BETA*U)))
        # For dG_cRL, use sample mean estimator
        dG_cRL = -1/BETA*np.log(np.mean(\
            np.exp(-BETA*DeltaU+min(BETA*DeltaU)))) + min(DeltaU)

```

```

# Standard state correction
L = edges[-1]-edges[0]+delta
dG_xi = -1/BETA * np.log(L / L_o)

return dG_xi, dG_cL - dG_cRL, DeltaU

# Performs principal components analysis
com_c = com - np.mean(com, 0)
[w,v] = np.linalg.eig(np.dot(com_c.T,com_c)/com_c.shape[0])
com_pca = np.dot(com_c,v)

for dim in range(3):
    dG_xi_d, dG_c_d, U_c_d = calc_translational(com_pca[:,dim])
    dG_xi.append(dG_xi_d)
    dG_c.extend([dG_xi_d + dG_c_d])
    U_c.append(U_c_d)

# Rotational degrees of freedom

edges_2pi = np.linspace(-np.pi,np.pi,nbins)
edges_pi = np.linspace(0,np.pi,nbins)

def calc_rotational(x, edges, sine=False):
    delta = edges[1]-edges[0]
    centers = edges[:-1] + delta/2.

    # Obtain confinement potential
# See https://stackoverflow.com/questions/18921419/
# implementing-a-2d-fft-based-kernel-density-estimator-in-python-and-comparing-i
H = np.histogram(x,edges,density=True)[0]
sigma = scotts_factor*10.*delta
ker = np.exp(-(centers-centers[int(len(centers)/2)])**2/\
              2/sigma**2)/sigma/np.sqrt(2*np.pi)
rho = np.abs(np.fft.fftshift(np.fft.ifft(\
    np.fft.fft(H)*np.fft.fft(ker))).real)
rho /= np.sum(rho)*delta
U = -np.log(np.array(rho))/BETA

# Obtain confinement energies for bound state
inds = np.array(np.floor(\
    (x-edges[0])/delta),dtype=np.int)
inds[inds==nbins] = nbins-1
DeltaU = U[inds]

# Estimate confinement free energies

```



```

# For dG_cL, use numerical integral for expectation
if sine:
    dG_cL = -1/BETA*np.log(np.sum(np.sin(centers)*np.exp(-BETA*U))/\
                               np.sum(np.sin(centers)))
else:
    dG_cL = -1/BETA*np.log(np.mean(np.exp(-BETA*U)))
# For dG_cRL, use sample mean estimator
dG_cRL = -1/BETA*np.log(np.mean(\
    np.exp(-BETA*DeltaU+min(BETA*DeltaU)))) + min(DeltaU)

return dG_cL - dG_cRL, DeltaU

dG_c_d, U_c_d = calc_rotational(euler[:,0], edges_2pi)
dG_c.append(dG_c_d)
U_c.append(U_c_d)
dG_c_d, U_c_d = calc_rotational(euler[:,1], edges_pi, sine=True)
dG_c.append(dG_c_d)
U_c.append(U_c_d)
dG_c_d, U_c_d = calc_rotational(euler[:,2], edges_2pi)
dG_c.append(dG_c_d)
U_c.append(U_c_d)

return np.sum(dG_xi), np.sum(dG_c), np.sum(U_c,0)

dG = dict([(id,{}) for id in ids])

# Actually does free energy estimates
for id in ids:
    for solvent in ['GBSA']:
        for rmsd_filter in rmsd_filters:
            stride = len(Es[id]['RMSD'])/len(Es[id][solvent+'_RL'])
            ok_rmsd = Es[id]['RMSD'][:stride]<rmsd_filter
            Psi = (Es[id][solvent+'_RL'] - Es[id][solvent+'_R'] \
                  - Es[id][solvent+'_L'])[ok_rmsd]

            # Entropy from normal modes analysis
            if not np.isnan(Es[id]['nm_RL']).any():
                nm = Es[id]['nm_RL'] - Es[id]['nm_R'] - Es[id]['nm_L']
                stride = len(ok_rmsd)/len(Es[id]['nm_RL'])
                nm_TdS = np.mean(nm[ok_rmsd[:stride]])
            else:
                nm_TdS = np.nan

            # Free energy estimate without binding site correction
            # or ligand confinement free energy

```

```

# and without reweighting
dG[id]['s_no_rw%.2f_o'%(solvent,rmsd_filter)] = \
    estimate_dG(Psi, nm_TdS)
# or with reweighting
stride = len(Es[id]['sampler'])/len(Es[id][solvent+'_RL'])
DeltaU = (Es[id][solvent+'_RL'] - Es[id]['sampler'][::stride])[ok_rmsd]
dG[id]['s_rw%.2f_o'%(solvent,rmsd_filter)] = \
    estimate_dG(Psi, nm_TdS, DeltaU)

# External dof corrections
(dG_xi, dG_c, U_c) = calc_confinement_fe(\
    Es[id]['com'][ok_rmsd[:Es[id]['com'].shape[0]]], \
    Es[id]['euler_angles'][ok_rmsd[:Es[id]['euler_angles'].shape[0]]])

# With binding site correction
dG[id]['s_no_rw%.2f_xi'%(solvent, rmsd_filter)] = \
    estimate_dG(Psi, nm_TdS) + dG_xi
dG[id]['s_rw%.2f_xi'%(solvent, rmsd_filter)] = \
    estimate_dG(Psi, nm_TdS, DeltaU) + dG_xi
# With ligand confinement free energy
dG[id]['s_no_rw%.2f_c'%(solvent, rmsd_filter)] = \
    estimate_dG(Psi[(Psi.shape[0] - U_c.shape[0]):], nm_TdS, \
    U_c) + dG_c
dG[id]['s_rw%.2f_c'%(solvent, rmsd_filter)] = \
    estimate_dG(Psi[(Psi.shape[0] - U_c.shape[0]):], nm_TdS, \
    DeltaU[(Psi.shape[0] - U_c.shape[0]):] + U_c) + dG_c

for confinement in ['o','xi','c']:
    key = 'GBSA_no_rw%.2f_s'%(rmsd_filters[0], confinement)
    print 'Free energies for '+key
    for id in ids:
        print id + '\t' + ' '.join(['%6.2f'%fe \
            for fe in dG[id][key]])
    print

#####
# Performance analysis #
#####

from scipy.stats import spearmanr, kendalltau

def PearsonR(x, y):
    return np.corrcoef(x,y)[0,1]

def SpearmanR(x, y):

```

```

    return spearmanr(x,y)[0]

def KendallTau(x, y):
    return kendalltau(x,y)[0]

def RMSE(x,y):
    return np.sqrt(np.mean((x-y)**2))

def aRMSE(x,y):
    mean_diff = np.mean(x)-np.mean(y)
    return np.sqrt(np.mean((x-y-mean_diff)**2))

def bootstrap_std(x,y,func):
    vals = []
    rep = 0
    while rep<1000:
        inds = np.random.randint(len(x), size=len(x))
        val = func(x[inds],y[inds])
        if not np.isnan(val):
            vals.append(func(x[inds],y[inds]))
            rep += 1
    return np.std(vals)
metrics = ['PearsonR', 'SpearmanR', 'KendallTau', 'RMSE', 'aRMSE']

if not args.skip_analysis:
    dG_r = np.array([ref_dG[id] for id in ids])
    print 'Performance analysis:'
    print
    print '&&%17s%' + ''.join(['&%13s'%t \
        for t in ['1','2','3','4','EXP','1+nm']]) + '\\\\'

    solvent = 'GBSA' # also could be 'PBSA'
    rw = 'no_rw' # also could be 'rw'
    for rmsd_filter in rmsd_filters:
        for confinement in ['_o','_xi','_c']:
            prefix = repr(rmsd_filter) + '&' + \
                {'_o':' No', '_xi':'Site', '_c':'Yes'}[confinement] + '&'
            tables = {}
            for metric in metrics:
                tables[metric] = []
            rows = {}
            for metric in metrics:
                rows[metric] = [prefix + '%11s'%metric]
            key = '%s_%s_%.2f%s'%(solvent,rw,rmsd_filter,confinement)
            for order_ind in range(6):

```

```

dG_t = np.array([dG[id][key][order_ind] for id in ids])
rows['PearsonR'].append('%6.2f (%.2f)'\%(\
    PearsonR(dG_r,dG_t),bootstrap_std(dG_r,dG_t,locals()['PearsonR'])))
rows['SpearmanR'].append('%6.2f (%.2f)'\%(\
    SpearmanR(dG_r,dG_t),bootstrap_std(dG_r,dG_t,locals()['SpearmanR'])))
rows['KendallTau'].append('%6.2f (%.2f)'\%(\
    KendallTau(dG_r,dG_t),bootstrap_std(dG_r,dG_t,locals()['KendallTau'])))
rows['RMSE'].append('%6.2f (%.2f)'\%(\
    RMSE(dG_r,dG_t),bootstrap_std(dG_r,dG_t,locals()['RMSE'])))
rows['aRMSE'].append('%6.2f (%.2f)'\%(\
    aRMSE(dG_r,dG_t),bootstrap_std(dG_r,dG_t,locals()['aRMSE'])))
for metric in metrics:
    tables[metric].append(rows[metric][0] + \
        ''.join(['%14s'%r for r in rows[metric][1:]]) + '\\\\')

# Print out a table
for metric in metrics:
    print '\n'.join(tables[metric])
print

```

## References

- (1) Aldeghi, M.; Heifetz, A.; Bodkin, M. J.; Knapp, S.; Biggin, P. C. Accurate Calculation of the Absolute Free Energy of Binding for Drug Molecules. *Chem. Sci.* **2016**, *7*, 207–218.
- (2) Gee, C. L.; Drinkwater, N.; Tyndall, J. D. A.; Grunewald, G. L.; Wu, Q.; McLeish, M. J.; Martin, J. L. Enzyme Adaptation to Inhibitor Binding: A Cryptic Binding Site in Phenylethanolamine N-Methyltransferase. *J. Med. Chem.* **2007**, *50*, 4845–4853.
- (3) Morton, A.; Matthews, B. W. Specificity of Ligand Binding in a Buried Nonpolar Cavity of T4 Lysozyme: Linkage of Dynamics and Structural Plasticity. *Biochemistry* **1995**, *34*, 8576–8588.
- (4) Duan, L.; Liu, X.; Zhang, J. Z. H. Interaction Entropy: A New Paradigm for Highly Efficient and Reliable Computation of Protein-Ligand Binding Free Energy. *J. Am. Chem. Soc.* **2016**, *138*, 5722–5728.
- (5) O’Boyle, N. M.; Banck, M.; James, C. A.; Morley, C.; Vandermeersch, T.; Hutchison, G. R. Open Babel: An Open Chemical Toolbox. *J. Cheminformatics* **2011**, *3*, 33.
